# Supplementary material for: Bacterial Diversity in Solenopsis invicta and Solenopsis geminata Ant Colonies Characterized by 16S amplicon 454 Pyrosequencing
Source: Springer Nature journal article supplement (doi:10.1007/s00248-010-9793-4), 2011-01-17
Supplement: MOESM3 [file 248_2010_9793_MOESM3_ESM.xls]

## Sheet: Supplementary Table 1
Supplementary Table 1.BLAST results according to its nearest genus (matched at 100-75% identity) for all 454-generated sequences and analyzed separately for each sample providing relative abundance percentages.
Sample	A1	A2	A3	A4	A5	A6	A7	A8	A9	B1	B2	B3	B4	B5	B6	B7	B8	C1	C2	C3	C4	C5	D1	D2	D3	D4	D5	E1	E2	E3	E4	E5
Sample type	Negative Control	Soil Outside	Soil Chamber	Worker	Brood	Negative Control	Soil Outside	Soil Chamber	Worker	Stored Seeds	Negative Control	Soil Outside	Soil Chamber	Worker	Brood	Alate	Stored Seeds	NegativeControl	Soild Outside	Soil Chamber	Worker	Brood	Negative Control	Soil Outside	Soil Chamber	Worker	Brood	Negative Control	Soil Outside	Soil Chamber	Worker	Brood
# Raw sequence tags	236	3719	4002	8202	847	2221	2980	3058	9754	4259	2874	3870	3771	802	3214	3914	4097	1040	3311	3990	12049	1927	2732	2356	2393	2197	5381	2447	2051		244	2631
# Blast matches (minimum of 75% identity)	228	2939	3301	8193	157	1646	2366	2479	9741	175	2843	3577	3040	642	3101	3802	456	108	2634	3127	11659	1905	2726	1935	2011	2071	5205	1100	1741		227	2621
% Blast identified sequences	96.6102	79.0266	82.4838	99.8903	18.536	74.1108	79.396	81.0661	99.8667	4.10895	98.9214	92.4289	80.6152	80.0499	96.4841	97.1385	11.1301	10.3846	79.553	78.3709	96.7632	98.8583	99.7804	82.1307	84.0368	94.2649	96.7292	44.953	84.8854	#DIV/0!	93.0328	99.6199
# Genera per Sample	10	164	161	22	24	17	220	231	26	42	17	226	248	36	53	32	86	8	159	183	86	36	16	177	191	42	70	6	166	134	26	57
# Genera <1%	3	150	148	21	11	8	205	212	25	15	8	213	229	19	42	17	61	4	144	171	72	34	7	160	167	24	51	1	150	120	15	51
# of Genera between 1 and 5%	1	10	8	0	7	4	12	17	0	22	5	9	15	9	9	9	20	0	13	8	10	1	7	14	20	13	11	3	12	11	8	3
# Genera >5%	6	4	5	1	6	5	3	2	1	5	4	4	4	8	2	6	5	4	2	4	4	1	2	3	4	5	8	2	4	3	3	3
Bacteria Genera identified via BLAST
Acaryochloris	0	0	0	0	0	0	0	0	0	0	0	0.195695	0	0	0	0	0	0	0	0	0	0	0	0	0	0	0	0	0	0	0	0
Acetivibrio	0	0	0	0	0	0	0	0	0	0	0	0.111826	0	0	0	0	0	0	0	0	0	0	0	0	0	0	0	0	0	0	0	0
Acetobacteraceae genus	0	0	0	0	0	0	0.0422654	0	0	0	0	0	0	0	0	0	0	0	0	0	0	0	0	0	0	0	0	0	0	0	0	0
Achromobacter	0.438596	0	0	0	0	0	0	0	0	0	0	0	0	0	0	0	0	0	0	0	0	0	0	0	0	0	0	0.181818	0	0	0	0
Acidimicrobiaceae genus	0	0.442327	0.514995	0	0	0	0.380389	0.484066	0	0	0	0.0838692	0.394737	0	0.193486	0	0	0	0.303721	0.447713	1.63822	0	0	0.620155	0.447539	1.25543	0	0	0.516944	0.243704	0.440529	0.0381534
Acidiphilium	0	0	0	0	0	0	0	0	0	0	0	0	0.0986842	0	0	0	0	0	0	0	0	0	0	0	0	0	0	0	0	0	0	0
Acidobacteriaceae genus	0	0.170126	0.242351	0	0	0	0	0.121017	0	0	0	0.0559128	0.197368	0	0	0	0	0	0.22779	0.191877	0	0	0	0.0516796	0	0	0.0192123	0	0.114877	0	0	0
Acidobacterium	0	23.3413	12.8446	0.0122055	0	0	25.6128	24.2033	0.0205318	4.21687	0	2.76768	16.6118	2.49221	0.838439	0	2.19298	0	35.4973	18.708	0.771936	0	0	17.5194	11.8846	0.0482859	7.89625	0	19.9885	16.8968	0	0.0763068
Acidothermus	0	0	0.0605877	0	0	0	0.0845309	0.0403388	0	0	0	0	0	0	0	0	0	0	0.0379651	0.0319795	0	0	0	0	0	0	0	0	0	0	0	0
Acidovorax	0	0	0	0.0244111	0	0	0	0	0	0	49.2438	0	0	0	0	1.42031	0.877193	0	0	0	0	0	18.1952	0	0	0	0	0	0	0	0	0
Acinetobacter	0	0	0	0.195289	16.5605	1.94411	0	0.0403388	0.0102659	0.60241	18.6071	0	2.86184	15.4206	2.16059	6.15466	3.07018	14.8148	0	0.127918	8.49129	0.262467	62.5092	0	0	2.22115	0.153698	0	0	0.0812348	0.881057	30.8661
Acrocarpospora	0	0.0340252	0	0	0	0	0	0	0	0	0	0	0.0328947	0	0	0	0	0	0	0	0	0	0	0.0516796	0	0	0	0	0	0	0	0
Actinaurispora	0	0	0	0	0	0	0	0	0	0	0	0	0.0986842	0	0	0	0	0	0	0	0	0	0	0	0	0	0	0	0	0	0	0
Actinoallomurus	0	0	0	0	0	0	0.0422654	0	0	0	0	0	0.0657895	0	0	0	0	0	0	0	0	0	0	0	0.0497265	0	0.0576369	0	0	0	0	0
Actinoalloteichus	0	0.102076	0.151469	0	0	0	0.0422654	0.0403388	0	0	0	0	0	0	0	0	0	0	0	0	0	0	0	0	0.0497265	0	0	0	0	0	0	0
Actinocatenispora	0	2.00749	3.05968	0	0	0	2.28233	0.443727	0	1.80723	0	0.0279564	0.723684	0.778816	0	0	0	0	0.569476	3.19795	0.00857706	0	0	0.155039	0.248633	0	0	0	2.01034	2.92445	0	0
Actinokineospora	0	0	0	0	0	0	0	0	0	0	0	0	0.0328947	0	0	0	0	0	0	0	0	0	0	0	0	0	0	0	0	0	0	0
Actinomadura	0	0.136101	0.151469	0	0	0	0.126796	0.121017	0	0	0	0	0.328947	0	0	0	0.438596	0	0.0379651	0.127918	0	0	0	0.775194	0.198906	0	0	0	0	0	0	0
Actinomyces	0	0.238176	0.0908816	0	0.636943	0	0	0	0	0	0	0.0279564	0.0328947	0.155763	0	0	1.09649	0	0.113895	0.287816	0.0514624	0	0	0	0.0497265	0	0	0	0	0.0812348	0	0
Actinomycetales genus	0	0	0	0	0	0	0	0.0403388	0	0	0	0.0279564	0.0657895	0	0	0	0	0	0	0.0639591	0.0171541	0.104987	0	0	0.248633	0	0.0192123	0	0	0	0	0
Actinomycetospora	0	0	0	0	0	0	0	0	0	0	0	0	0	0	0.096743	0	0	0	0	0	0	0	0	0	0.0497265	1.44858	0	0	0	0	0	0
Actinophytocola	0	0	0.0302939	0	0	0	0.0845309	0.0403388	0	0	0	0	0	0	0	0	0	0	0	0	0	0	0	0.361757	0	0	0	0	0	0	0	0
Actinoplanes	0	0.170126	0.0908816	0	0	0	0.295858	0.121017	0	0	0	0.0838692	0.197368	0	0	0	0.219298	0	0.15186	0.607611	0.0171541	0	0	0.568475	0.14918	0	0	0	0.0574383	0	0	0.0763068
Actinotelluria	0	0	0	0	0	0	0	0	0	0	0	0	0	0	0	0	0.219298	0	0.0379651	0	0	0	0	0	0	0	0	0	0	0	0	0
Adhaeribacter	0	0	0	0	0	0	0.253593	0	0	0	0	0.0279564	0.0328947	0	0	0	0	0	0	0	0	0	0	0	0.248633	0	0	0	0.0574383	0	0	0
Aeromicrobium	0	0	0.333232	0	0	0	0	0.36305	0.0205318	3.01205	0	0	0.822368	0.155763	0.0644953	0	0.438596	0	0	0.0639591	3.1049	0	0	0.0516796	0	2.99372	0	0	0	0.0812348	4.40529	0.22892
Afifella	0	0	0	0	0	0	0	0	0	0.60241	0	0	0.0328947	0	0	0	0	0	0	0	0	0	0	0	0	0	0	0	0	0	0	0
Afipia	0	0.272201	0.0605877	0	0	0	0.0422654	0.242033	0	0	0	0.0559128	0.164474	0	0	0	0	0	0	0.0319795	0.0343083	0	0	0.258398	0.0497265	0.531144	0	0	0	0.0812348	0	0
Agrobacterium	0	0	0	0	0	0	0.0422654	0	0	0	0	0.0279564	0	0	0	0	0.657895	0	0	0	0	0	0	0	0	0	0	0	0	0	0	0
Agromonas	0	0	0.0302939	0	0	0	0	0	0	0	0	0	0	0	0	0	0	0	0	0	0	0	0	0	0	0	0	0	0	0	0	0
Agromyces	0	0	0	0	0	0	0	0.0403388	0	0	0	0	0.0657895	0	0.0322477	0	0	0	0	0	0	0	0	0	0.0497265	4.05601	0	0	0	0	0	0
Alcaligenaceae genus	0	0	0	0	0	0	0	0	0	0	0	0	0	0	0	0	0	0	0	0	0	0	0	0	0	0	0	0	0.0574383	0	0	0
Alcaligenes	0	0	0	0	0	0	0	0	0	0	0	0.0559128	0	0	0	0	0	0	0	0	0	0	2.4945	0	0	0	0	0	0	0	0	0
Alistipes	0	0	0	0	0	0	0	0	0	0	0	0	0	0	0	0	0	0	0	0	0	0	0	0	0.447539	0	0	0	0	0.0812348	0	0
Alkaliflexus	0	0	0	0	0	0	0.0422654	0.201694	0	0	0	0	0.0986842	0.155763	0	0	0	0	0.15186	0	0	0	0	0.0516796	0.248633	0	0	0	0	0	0	0
Altererythrobacter	0	0	0	0	0	0	0.0422654	0	0	0	0	0	0	0	0	0	0.219298	0	0	0	0.0857706	0	0	0	0	0	0	0	0	0	0	0
Amaricoccus	0	0.0340252	0.302939	0	0	0	0	0.0806777	0	0	0	0.0838692	0	0	0	0	0	0	0	0.0319795	0	0	0	0.0516796	0	0	0	0	0.0574383	0	0	0
Aminomonas	0	0	0	0	0	0	0	0.0403388	0	0	0	0	0	0	0	0	0	0	0	0	0	0	0	0	0	0	0	0	0	0	0	0
Ammoniphilus	0	0	0	0	0	0	0	0	0	0	0	0.139782	0.0986842	0	0	0	0	0	0.0759301	0	0	0	0	1.08527	0.646445	0	0	0	0.402068	0.16247	0	0
Amorphus	0	0	0	0	0	0	0	0	0	0	0	0	0	0	0	0	0	0	0	0	0	0	0	0	0.0497265	0	0	0	0	0	0	0
Amycolatopsis	0	0.0340252	0.0605877	0	0	0	0	0.0806777	0	0	0	1.00643	0.197368	0	0	0	0.219298	0	0	0.575632	0	0	0	0.103359	0.0497265	0	0	0	0.114877	0	0	0
Anabaena	0	0	0	0	0	0	0.169062	0	0	0	0	3.88594	0	0	0	0	0.219298	0	0	0	0	0	0	0	0	0	0	0	0	0	0	0
Anaerolinea	0	0.0680504	0	0	0	0	0	0	0	0	0	0	0	0	0	0	0	0	0.0379651	0	0	0	0	0	0	0	0	0	0	0.0812348	0	0
Anaeromyxobacter	0	0.0680504	0	0	0	0	0.0845309	0.0403388	0	0	0	0	0	0	0	0	0	0	0	0.0319795	0	0	0	0.0516796	0.099453	0	0	0	0.114877	0.0812348	0	0
Anaeroplasma	0	0	0	0	0	0	0	0	0	0	0	0	0	0	0	0	0	0	0	0	4.25422	0	0	0	0	0	0	0	0	0	0	0
Anaerovibrio	0	0	0	0	0	0	0	0	0	0	0	0.111826	0	0	0	0	0	0	0	0	0	0	0	0	0	0	0	0	0	0	0	0
Anoxybacillus	0	0	0	0	0	0	0	0	0	0	0	0	0	0	0	0	0	0	0	0	0	0	0	0.0516796	0.099453	0	0	0	0	0	0	0
Aquaspirillum	0	0	0	0	0	0	0	0	0	0	0	0	0	0	0	0	0	0	0	0.0319795	0	0	0	0	0	0	0	0	0	0	0	0
Aquicella	0	0	0	0	0	0	0.0422654	0.0403388	0	0	0	0	0	0	0	0	0	0	0.0759301	0.0959386	0	0	0	0	0	0	0	0	0	0	0	0
Aquiflexum	0	0.102076	0.0302939	0	0	0	0.0422654	0.36305	0	0	0	0.0559128	0.131579	0	0	0	0	0	0	0	0.0343083	0	0	0	0.0497265	0	0.115274	0	0	0	0	0
Archangium	0	0	0	0	0	0	0	0.0403388	0	0	0	0	0.0328947	0	0	0	0	0	0	0	0	0	0	0	0	0	0.0192123	0	0	0	0	0
Arcicella	0	0	0	0	0	0	0	0.0403388	0	0	0	0.0838692	0	0	0	0	0	0	0	0	0.00857706	0	0	0	0	0	0	0	0	0	0	0
Arenimonas	0	0	0	0	0	0	0	0	0	0	0	0	0	0	0	0	0	0	0	0.0639591	0	0	0	0	0	0	0	0	0	0	0	0
Arthrobacter	0	0.340252	0.757346	0.0244111	0	0	0.676247	0.605083	0	1.80723	0	0.0559128	0.592105	0	0.54821	0	2.85088	0	0.0759301	0.287816	1.76688	0	0	0.620155	1.39234	0	0.211335	0	1.03389	1.54346	0.440529	0
Asanoa	0	0	0	0	0	0	0.0422654	0.121017	0	0	0	0.0559128	0.0986842	0	0	0	0	0	0.265756	0.639591	0	0	0	0	0	0	0	0	0	0.0812348	0	0
Asticcacaulis	0	0	0	0	0	0	0	0	0	0	0	0	0.0986842	0	0	0	0.219298	0	0	0	0	0	0	0	0	0	0	0	0	0	0	0
Azospirillum	0	0.0680504	0.151469	0	0	0	0.591716	1.12949	0	0	0	0.559128	1.11842	0	0	0	0.219298	0	0	0	0	0	0	0.310078	0.546992	0	0	0	0.229753	0.16247	0	0
Azotobacter	0	0	0	0	0.636943	0	0	0	0	0	0	0	0	0	0	0	0	0	0	0	0	0	0	0	0	0	0	0	0	0	0	0
Azovibrio	0	0	0	0	0	0	0	0	0	0	0	0	0	0	0	0	0	0	0	0	0	0	0	0	0	0	0.0192123	0	0	0	0	0
Bacillaceae genus	0	0	0	0	0	0	0	0	0	0	0	0	0	0	0	0	0.438596	0	0.0379651	0	0	0	0	0.258398	0.198906	0	0	0	0.114877	0	0	0
Bacillales genus	0	0	0	0	0	0	0.380389	0.121017	0	0	0	0.0279564	0.0657895	0	0.096743	0	0	0	0	0	0	0	0	0.361757	0.646445	0	0	0	0	0.0812348	0	0
Bacillus	0	0.578428	1.78734	0.0122055	0	0	2.24007	3.54982	0.0307977	0	0	0.363433	5.92105	10.4361	1.06417	0.0789058	2.41228	0	1.44267	0.863447	0.231581	0.314961	0	12.5581	3.28195	1.06229	6.878	0	6.83515	1.70593	0	0.305227
Bacteriovorax	0	0	0	0	0	0	0	0	0	0	0	0	0	0	0	0	0	0	0	0	0	0	0	0.0516796	0	0	0	0	0	0	0	0
Bacteroidaceae genus	0	0	0	0	0	0	0.0422654	0	0	0	0	0	0	0	0	0	0	0	0	0	0	0	0	0	0	0	0	0	0	0	0	0
Bacteroides	0	0.306227	0	0	0	0.0607533	0.126796	0	0	0.60241	0	0	0	0	2.45082	4.62914	0.219298	0	0	0	0.00857706	0.0524934	0	0	1.04426	0	0.0192123	0	1.43596	3.00569	0	0
Balneimonas	0	0	0.0302939	0	0	0	0.380389	0.726099	0	0	0	0.615041	0.493421	0	0	0	0	0	0	0	0.120079	0	0	0.361757	1.79015	0	0.384246	0	0	0.649878	0	0
Bartonella	0	0	0	0	0	0	0	0	0	1.20482	0	0	0	0	0	0	0	0	0	0	0	0	0	0	0	0	0	0	0	0	19.8238	0.0381534
Bdellovibrio	0	0	0.0302939	0	0	0	0	0	0	0	0.668308	0	0.0328947	0	0	0	0	0	0	0	0	0	0	0	0	0	0.730067	0	0	0	0	0
Beggiatoa	0	0	0	0	0	0	0	0.0806777	0	0	0	0	0	0	0	0	0	0	0	0	0	0	0	0	0	0	0	0	0	0	0	0
Beijerinckia	0	0	0	0	0	0	0	0	0	0	0	0	0	0	0	0	0	0	0	0	0	0	0	0	0	0.0482859	0	0	0	0	0	0
Beijerinckiaceae genus	0	0	0	0	0	0	0	0.36305	0	0	0	0.111826	0	0	0	0	0	0	0.113895	0	0.317351	0	0	0.0516796	0.198906	0	0	0	0	0	0	0
Bellilinea	0	0	0	0	0	0	0	0	0	0	0	0	0	0	0	0	0	0	0	0.0959386	0	0	0	0	0	0	0	0	0	0	0	0
Belnapia	0	0	0	0	0	0	0	0	0	0	0	0	0.0328947	0	0	0	0	0	0	0	0	0	0	0	0	0	0	0	0	0	0	0
Blastochloris	0	0.170126	0.0908816	0	0	0	0	0.161355	0	0	0	0.0838692	0.0986842	0.934579	0	0	0	0	0.189825	0.351775	0.0943477	0	0	0.361757	0.14918	0	0	0	0.229753	0.406174	0	0
Blastococcus	0	0	0.0605877	0.0122055	0	0	0.126796	0.121017	0	0	0	0.0838692	0.0986842	0	0	0	0.219298	0	0	0	0	0	0	0.310078	0.944804	0	0	0	0.114877	0	0	0
Blastomonas	0	0	0	0	0	0	0	0	0	0	0	0.0279564	0	0	0	0	0	0	0	0	0	0	0	0	0	0	0	0	0	0	0	0
Blastopirellula	0	0.170126	0.181763	0	0	0	0	0.0403388	0	0	0	0	0.0328947	0	0	0	0	0	0	0	0	0	0	0	0	0	0	0	0	0	0	0
Bosea	0	0.0340252	0.181763	0	0	0	0.507185	1.00847	0	0	0	0.279564	0.657895	0	0	0	0	0	0.0379651	0	0	0	1.72414	0.568475	1.4918	0	0.0192123	0	0.34463	0	0	0
Brachybacterium	0	0	0	0	0	0	0	0	0	0	0	0	0	0	0	0	0	0	0.0379651	0	0	0	0	0	0	0	0	0	0	0	0	0
Bradyrhizobiaceae genus	0	0.0340252	0	0	0	0	0	0.0806777	0	0	0	0.0279564	0.0328947	0	0	0	0	0	0.0379651	0.0639591	0.0428853	0	0	0	0.14918	0.0965717	0	0	0.229753	0	0	0
Bradyrhizobium	0	0.612453	1.21175	0	0	0	0.591716	1.29084	0	0	0	0.195695	1.15132	0	0.0322477	0	0	0	0.113895	1.2472	0.0686165	0	0	0.568475	0.248633	5.02173	0	0	0.919012	0.487409	0	0
Brasilonema	0	0	0	0	0	0	0	0	0	0	0	0.111826	0	0	0	0	0	0	0	0	0	0	0	0	0	0	0	0	0	0	0	0
Brevibacillus	0	0	0	0	0	0	0.0422654	0.0403388	0	0	0	0	0.164474	0	0	0	0	0	0	0	0	0	0	0.413437	0.0497265	0	0	0	0.0574383	0	0	0
Brevibacterium	0	0	0	0	0	0	0	0	0	0	0	0.0279564	0.131579	0	0	0	0	0	0	0	0	0	0	0	0	0	0	0	0	0	0	0
Brevinema	0	0	0	0	0	0	0	0	0	0	0	0	0.0328947	0	0	0	0	0	0	0	0	0	0	0	0	0	0	0	0	0	0	0
Brevundimonas	0	0	0	0	0	0	0	0.0403388	0	0	0	0.223651	0	0	0	0	0	0	0	0	0	0	0	0	0.0497265	0	2.0365	0	0	0	0	0
Brucella	0	0	0	0	0	0	0	0	0	0	0	0	0	0	0	0	0	0	0	0	0	0	0	0	0	0	0	0	0	0	1.32159	0
Burkholderia	0	0.0340252	0	0	0	0	0	0	0	0	0	0.0559128	0.131579	0	0	0	0	0.925926	0.22779	0	0	0	0	0.0516796	0.0497265	0	0.0960615	0	0	0	0	0
Burkholderiaceae genus	0	0	0	0	0	0	0.0845309	0	0	0	0	0	0	0	0	0	0	0	0	0	0	0	0	0	0.0497265	0	0	0	0	0	0	0
Byssovorax	0	0.102076	0.0302939	0	0	0	0.169062	0.201694	0	1.20482	0	0.363433	0.263158	0	0	0	0	0	0.15186	0.0639591	0	0	0	0.413437	0.0497265	0	0	0	0.0574383	0	0	0
Caldaterra	0	0	0	0	0	0	0	0	0	0	0	0	0	0	0	0	0	0	0.0379651	0	0	0	0	0	0	0	0	0	0	0	0	0
Caldilinea	0	1.39503	0.39382	0	0	0	1.81741	1.16983	0	0.60241	0	0.223651	1.11842	0	0	0	0	0	1.48064	2.30253	0.0857706	0	0	0.516796	0.795624	11.83	0	0	0.574383	0.649878	0	0
Calothrix	0	0	0	0	0	0	0.0845309	0	0	0	0	10.232	0	0	0	0	0	0	0	0	0	0	0	0	0	0	0	0	0	0	0	0
Candidatus Amoebophilus	0	0	0	0	0	0	0	0	0	0	0	0	0	0	0	0	0	0	0	0	0	0	0	0	0.0497265	0	0	0	0	0	0	0
Candidatus Entotheonella	0	0	0	0	0	0	0	0	0	0	0	0	0	0	0	0	0	0	0	0	0	0	0	0.206718	0	0	0	0	0.0574383	0	0	0
Candidatus Microthrix	0	0.0340252	0	0	0	0	0	0	0	0	0	0.0279564	0	0	0	0	0	0	0	0.0319795	0	0	0	0	0	0	0	0	0	0	0	0
Candidatus Nitrospira	0	0	0	0	0	0	0	0	0	0	0	0	0	0	0	0	0	0	0.0759301	0	0	0	0	0	0	0	0	0	0	0	0	0
Candidatus Pelagibacter	0.438596	0	0	0	0	0	0	0	0	0	0	0	0	0	0	0	0	0	0	0	0	0	0	0	0	0	0	0	0	0	0	0
Candidatus Solibacter	0	0	0	0	0	0	0	0	0	0	0	0	0	0	0	0	0	0	0	0	0.00857706	0	0	0	0	0	1.19116	0	0	0	0	0
Capnocytophaga	0	0	0	0	0	0	0	0	0	0	0	0	0	0	0	0	0	0	0	0	0.14581	0	0	0	0	0	0	0	0	0	0	0
Carnobacterium	0	0	0	0	0	0	0	0	0	0	0	0.0279564	0	0	0	0	0	0	0.0379651	0	0	0	0	0	0.099453	0	0	0	0	0	0	0
Catellatospora	0	0.170126	0.121175	0	0	0	0	0.0403388	0	0	0	0	0.0986842	0	0	0	0	0	0.0759301	0.159898	0	0	0	0.0516796	0	0	0	0	0	0	0	0
Catenulispora	0	0	0	0	0	0	0.0845309	0	0	1.20482	0	0	0	0	0	0	0	0	0	0.0319795	0	0	0	0	0	0	0	0	0	0	0	0
Catenuloplanes	0	0	0	0	0	0	0	0.0403388	0	0	0	0.0279564	0	0	0	0	1.09649	0	0	0	0	0	0	0	0	0	0	0	0	0	0	0
Caulobacter	0	0	0	0	0	0	0.0845309	0.0806777	0	0	0	0.363433	0.164474	0	0	0	0	0	0.0379651	0	0.0600395	0	0	0.0516796	0.0497265	0	0	0	0	0.16247	0	0
Caulobacteraceae genus	0	0	0	0	0	0	0	0	0	0	0	0	0.0328947	0	0	0	0	0	0.0379651	0	0	0	0	0	0	0	0	0	0	0	0	0
Cellulosimicrobium	0	0.0680504	0	0	0	0	0	0.0403388	0	0	0	0	0	0	0	0	0	0	0.797267	0.383754	0.00857706	0	0	0	0.099453	0	0	0	0	0.16247	0	0
Chelatococcus	0	0.0340252	0.0908816	0	0	0	0.295858	0.605083	0	0	0	0.195695	0.230263	0	0.096743	0	0.219298	0	0.0379651	0	0	0	0	0.103359	0.198906	0	0	0	0.114877	0.16247	0	0
Chitinophaga	0	0	0	0	0	0	0.0422654	0	0	0	0	0.0279564	0	0	0	0	0	0	0.0379651	0	0	0	0	0.0516796	0.0497265	0	0	0	0	0	0	0
Chloroflexaceae genus	0	0	0	0	0	0	0	0	0	0	0	0	0	0	0	0	0	0	0	0.0319795	0	0	0	0	0	0	0	0	0	0	0	0
Chloroflexus	0	0.170126	0.151469	0	0	0	0.169062	0.201694	0	0	0	0.754822	0.263158	0.46729	0.0322477	0	0	0	0.341686	0.0639591	0	0	0	0.310078	0.198906	0	0.172911	0	0.172315	0.324939	0	0
Chloronema	0	0	0	0	0	0	0	0	0	0	0	0.0279564	0	0	0	0	0	0	0	0	0	0	0	0	0	0	0	0	0	0	0	0
Chondromyces	0	0	0	0	0	0	0.0422654	0	0	0	0	0.0559128	0	0.46729	0	0	0	0	0.22779	0.0639591	0	0	0	0.155039	0.0497265	0	0	0	0	0	0	0
Chromatium	0	0	0	0	0	0	0	0	0	0	0	0	0	0	0	0	0	0	0.0379651	0.0319795	0	0	0	0	0	0	0	0	0	0	0	0
Chroococcales genus	0	0	0	0	0	0	0	0	0	0	0	0	0.0328947	0	0	0	0	0	0	0	0	0	0	0	0	0	0	0	0.0574383	0	0	0
Chroococcidiopsis	0	0	0	0	0	0	0	0	0	0	0	0.363433	0	0	0	0	0	0	0	0	0	0	0	0	0	0	0	0	0	0	0	0
Chroococcus	0	0	0	0	0	0	0	0	0	0	0	0.0279564	0	0	0	0	0	0	0	0	0	0	0	0	0	0	0	0	0	0	0	0
Chryseobacterium	0.438596	0	0	0.0122055	0	0	0	0	0	1.80723	1.16075	0	0.0328947	0	0	0	2.41228	0	0	0	0	0	0.696992	0	0	0.193143	0	0	0	0.0812348	0	0.0381534
Chthoniobacter	0	0.0340252	0	0	0	0	0	0.0403388	0	0	0	0.0279564	0.0657895	0	0	0	0	0	0	0.0319795	0	0	0	0	0.099453	0	0	0	0	0	0	0
Clostridiales genus	0	0	0	0	0	0.0607533	0	0	0	0	0	0	0.0328947	0	0	0	0	0	0	0.0639591	0	0	0	0.0516796	0	0	0	0	0.459506	0	0	0
Clostridium	0	0.204151	0.424114	0	0	38.3961	0.169062	0	0.0102659	0	0	0.0279564	0.394737	0	1.06417	0	0	0	0	0.0319795	0.00857706	0	0.0366838	0	0	0	12.9107	0	0.287191	0.487409	3.0837	0.11446
Cohnella	0	0.102076	0.0908816	0	0	0	0.0422654	0	0	0	0	0	0.0328947	0	0.0322477	0	0	0	0.0759301	0.223857	0	0	0	0.0516796	0.0497265	0	0	0	0.114877	0	0	0
Comamonadaceae genus	0	0	0.0302939	0	0	0	0	0	0	0	0	0	0	0	0	0	0	0	0	0	0	0	0	0	0	0	0	0	0	0	0	0
Comamonas	0	0	0	0.0244111	0	0.0607533	0	0	0	0	1.96975	0.0559128	0	3.73832	0	0	0	58.3333	0	0	0.300197	0	4.43874	0	0	0	0	0	0	0.324939	0	0
Conexibacter	0	10.854	16.601	0.0488222	0	0	7.01606	6.05083	0.0205318	2.40964	0	0.726866	7.10526	10.9034	2.41857	0.841662	2.19298	0	3.30296	5.34058	2.33296	0.15748	0	9.6124	12.6305	3.81458	3.68876	0	7.75416	8.44842	0	0.0763068
Corallococcus	0	0.0340252	0	0	0	0	0	0	0	0	0	0	0.0986842	0	0	0	0	0	0	0.0319795	0	0	0	0	0.099453	0	0	0	0	0	0	0
Corynebacterium	2.19298	0	0	0	28.6624	0	0	0	0	0	0	0	0.0328947	0	0	0	0.219298	0	0	0.0319795	0	0	0	0	0	0	0	0	0.0574383	0	0	0
Coxiella	0	0	0.0302939	0	0	0	0	0.0403388	0	0	0	0	0	0	0.096743	0	0	0	0	0	0	0	0	0	0	0	0.0192123	0	0	0	0	0
Craurococcus	0	0	0	0	0	0	0	0.0403388	0	0	0	0	0.0328947	0	0	0	0	0	0	0	0	0	0	0	0.0497265	0	0	0	0	0	0	0
Crenothrix	0	0	0	0	0	0	0	0	0	0	0	0	0	0	0	0	0	0	0	0	0	0	0	0.0516796	0	0	0	0	0.0574383	0	0	0
Cronobacter	0	0	0	0	0	0	0	0	0	0	0	0	0	0	0	0	0.438596	0	0	0	0	0	0	0	0	0	0	0	0	0	0	0
Crossiella	0	0	0	0	0	0	0	0.121017	0	0	0	0	0	0	0	0	0	0	0	0	0	0	0	0	0	0	0	0	0	0	0	0
Cryptosporangium	0	0	0	0	0	0	0	0	0	0	0	0.0279564	0.0986842	0	0	0	0	0	0	0	0	0	0	0.0516796	0	0	0	0	0	0	0	0
Cupriavidus	0	0	0	0	0	0	0.126796	0.121017	0	0	0	0.0279564	0.197368	0	0	0	0	0	0	0	0	0	0	0.0516796	0.248633	0	0	0	0.0574383	0.0812348	0	0.0381534
Curtobacterium	0	0	0	0	0	0	0	0	0	0.60241	0	0	0	0	0	0	7.67544	0	0	0	0	0	0	0	0	4.05601	0	0	0	0	0	0
Cyanothece	0	0	0	0	0	0	0	0	0	0	0	1.45373	0	0	0	0	0	0	0	0.0319795	0	0	0	0	0	0	0	0	0	0	0	0
Cylindrospermopsis	0	0	0	0	0	0	0	0	0	0	0	0.111826	0	0	0	0	0	0	0	0	0	0	0	0	0	0	0	0	0	0	0	0
Cylindrospermum	0	0	0	0	0	0	0	0	0	0	0	0.0559128	0	0	0	0	0	0	0	0	0	0	0	0	0	0	0	0	0	0	0	0
Cystobacter	0	0	0	0	0	0	0.0422654	0.201694	0	0	0	0	0.263158	0	0	0	0	0	0.0379651	0.0319795	0	0	0	0.103359	0.198906	0	9.8367	0	0.172315	0	0	0
Cytophaga	0	0	0.0302939	0	0	0	0.0422654	0	0.0821271	0.60241	0	0.0279564	0	0	0	0	0	0	0	0	0	0	0	0	0	0	0.345821	0	0.0574383	0	0.440529	0
Dactylosporangium	0	0.0340252	0.0302939	0	0	0	0.380389	0.282372	0	0	0	0	0.164474	0	0	0	0	0	0.0379651	0.479693	0	0	0	0.310078	0.397812	0	0	0	0	0.0812348	0	0
Dechloromonas	0	0	0	0	0	0	0	0	0	0	0	0	0	0	0	0	0	0	0	0	0	0	0.183419	0	0	0	0	0	0	0	0	0
Deferribacter	0	0.442327	0.181763	0	0	0	0.211327	0.605083	0	0	0	0	0.197368	0	0	0	0	0	0.417616	0	0	0	0	0.0516796	0.099453	0	0	0	0.34463	0.974817	0	0
Defluvibacter	0	0	0	0	0	0	0	0	0	0	0	0	0	0	0	0	0	0	0	0	0	0	0	0	0	0	0	0	0	0	0.440529	0
Defluviicoccus	0	0.102076	0	0	0	0	0.338123	0.282372	0	0	0	0.0838692	0.263158	0	0	0	0	0	0.0759301	0	0	0	0	0.155039	0.447539	0	0	0	0.402068	0.16247	0	0
Deinococcus	0	0	0	0	0	0	0.126796	0.36305	0	0	0	0.0279564	0.164474	0	0	0	0	0	0	0	0	0	0	0.0516796	0.696171	0	0	0	0.287191	0	0	0
Delftia	0	0	0	0	0	0	0	0	0	0	0	0	0	0	0	0	0	0	0	0.0319795	0	0	0	0	0	0	0	0	0	0	0	0
Demequina	0	0	0	0	0	0	0	0	0	0	0	0	0	0	0	0	0	0	0	0	0	0	0	0.0516796	0	0	0	0	0.0574383	0.16247	0	0
Denitratisoma	0	0.0340252	0.0908816	0	0	0	0.0845309	0.0403388	0	0	0	0	0	0	0	0	0	0	0.189825	0.0639591	0	0	0	0.103359	0.14918	0	0	0	0.0574383	0	0	0
Dermacoccus	0	0	0	0	0	0	0	0	0	0	0	0	0	0	0	0	0	0	0	0	0	0	0	0	0	0	0	0	0	0	0	0.0763068
Dermatophilaceae genus	0	0	0	0	0	0	0	0	0	0	0	0	0	0	0	0	0	0	0	0	0	0	0	0	0	0	0	0	0	0	0	0.0381534
Derxia	0	2.14359	1.57528	0	0	0	2.24007	1.65389	0	0	0	0.838692	1.34868	0	0	0	0.219298	0	0.569476	1.0873	0	0	0	1.39535	1.29289	0	0	0	2.06778	0.568643	0	0
Desulfobacca	0	0.0340252	0	0	0	0	0	0	0	0	0	0	0	0	0	0	0	0	0	0	0	0	0	0	0	0	0	0	0.0574383	0.0812348	0	0
Desulfobacterium	0	0	0	0	0	0	0	0.0403388	0	0	0	0	0	0	0	0	0	0	0	0	0	0	0	0	0	0	0	0	0	0	0	0
Desulfocella	0	0.0340252	0	0	0	0	0	0	0	0	0	0	0	0	0	0	0	0	0	0	0	0	0	0	0	0	0	0	0	0	0	0
Desulfofustis	0	0	0.0302939	0	0	0	0	0	0	0	0	0	0	0	0	0	0	0	0.0379651	0	0	0	0	0.0516796	0	0	0	0	0.0574383	0	0	0
Desulfonatronospira	0	0.0340252	0	0	0	0	0	0.0403388	0	0	0	0	0	0	0	0	0	0	0.645406	0.0959386	0	0	0	0	0	0	0	0	0	0	0	0
Desulfonauticus	0	0.306227	0.181763	0	0	0	0.211327	0	0	0	0	0	0	0	0	0	0	0	0.0759301	0	0	0	0	0	0.099453	0	0	0	0.0574383	0	0	0
Desulforegula	0	0.136101	0.0908816	0	0	0	0.0422654	0.201694	0	0	0	0.0559128	0.0986842	0	0	0	0	0	0	0.287816	0	0	0	0.258398	0.0497265	0	0	0	0.229753	0.0812348	0	0
Desulforhabdus	0	0	0	0	0	0	0.0422654	0	0	0	0	0.251607	0	0	0	0	0	0	0	0	0.0428853	0	0	0	0	0	0	0	0	0.0812348	0	0
Desulfosarcina	0	0	0	0	0	0	0	0	0	0	0	0	0	0	0	0	0	0	0	0	0	0.314961	0	0	0	0	0	0	0	0	0	0
Desulfotomaculum	0	0	0	0	0	0	0	0	0	0	0	0	0	0	0	0	0	0	0	0	0	0	0	0	0	0	0	0	0	0.0812348	0	0
Desulfovibrio	0	0.0340252	0	0	0	0	0	0	0	0	0	0	0	0	0	0	0	0	0	0	0	0	0	0	0	0	0	0	0	0	0	0
Desulfuromonas	0	0	0.0302939	0	0	0	0	0	0	0	0	0	0	0	0	0	0	0	0	0	0	0	0	0	0	0	0	0	0	0	0	0
Devosia	0	0	0	0	0	0	0	0.0806777	0	0	0	0.0838692	0.0986842	0	0	0	0.219298	0	0	0	0	0	0	0.0516796	0	0.820859	0	0	0	0	0	0
Dialister	0	0	0	0	0	0	0	0	0	0	0	0	0	0	0	0	0	0	0	0	0	0	0	0	0	0	0	0	0	0.0812348	0	0
Diaphorobacter	0	0	0	0	0	0	0	0	0	0	9.84875	0	0	0	0	0	0	0	0	0	0	0	2.60455	0	0	0	0	0	0	0	0	0
Dictyoglomus	0	0.0340252	0	0	0	0	0	0	0	0	0	0	0	0	0	0	0	0	0	0	0	0	0	0	0	0	0	0	0	0	0	0
Dietzia	0	0	0.0605877	0	0	0	0.0422654	0.927793	0	0	0	0	0.953947	0	0	0	0	0	0.0759301	0.0319795	0	0	0	0.155039	0.0497265	0	0	0	0.229753	0.0812348	0	0
Dokdonella	0	0	0	0	0	0	0	0	0	0	0	0	0.0328947	0	0	0	0	0	0	0	0	0	0	0	0	0	0	0	0	0	0	0
Dolichospermum	0	0	0	0	0	0	0	0	0	0	0	0.195695	0	0	0	0	0	0	0	0	0	0	0	0	0	0	0	0	0	0	0	0
Dorea	0	0	0	0	0	0	0	0	0	0	0	0	0	0	0	0	0	0	0	0	0	0	0	0	0	0	0	0	0.172315	0	0	0
Duganella	0	0	0	0.0122055	1.91083	0	0.0422654	0	0	0	0	0.0279564	0	0	0	0	3.28947	0	0	0.0319795	0	0	0	0	0.0497265	0	0	0	0	0.0812348	0	0
Dyadobacter	0	0	0	0	0	0	0	0	0	0	0	0	0	0	0	0	0.219298	0	0	0	0	0	0	0	0	0.241429	0	0	0	0	0	0
Dyella	0	0	0	0	0	0	0	0	0.718612	0	0	0	0	0	0	0	0	0	0	0.0319795	0	0	0	0	0	0	0	0	0	0	40.5286	0.0763068
Dysgonomonas	0	0	0	0	0	0	0	0	0	0	0	0	0	0	0	0	0	0	0	0	0	0.0524934	0	0	0	0	0	0	0	0	0	0
Eikenella	0	0	0	0	0	0	0	0	0	0	0.351741	0	0	0	0	0	0	0	0	0	0	0	0	0	0	0	0	0	0	0	0	0
Emticicia	0	0	0	0	0	0	0	0	0	0	0	0	0	0	0	0	0	0	0	0	0	0	0	0	0.0497265	0	0	0	0	0	0	0
Enhydrobacter	0	0	0	0	0	0	0	0	0	0	0	0	0.0328947	0	0	0	0	0	0	0	0	0	0	0	0	0	0	0	0	0	0	0
Enhygromyxa	0	0	0	0	0	0	0.0422654	0	0	0	0	0	0	0	0	0	0	0	0	0	0	0	0	0	0	0	0	0	0	0	0	0
Enterobacter	0	0	0	0	0.636943	0	0	0	0	0	0	0.0279564	0	0	0.096743	0	0.219298	0	0	0	0.0857706	0	0	0	0	0.0482859	0	0	0	0	0	5.79931
Enterobacteriaceae genus	0	0	0	0	0.636943	0	0.0422654	0	0	0	0	0	0	0	0	0	0	0	0	0.0319795	0.223004	0.0524934	0	0	0	0	0	0	0	0	0	0.0763068
Enterococcus	0	0.0680504	0	0	0	0	0	0	0	0.60241	0	0	0	0.934579	0	0	0.219298	0	0.0379651	0	0	4.35696	0	0	0	0	0	0	0	0	0	50.9729
Epilithonimonas	0	0	0	0	0	0	0	0	0	0.60241	0	0	0	0	0	0	0	0	0	0	0	0	0	0	0	0	0	0	0	0	0	0
Erwinia	0	0	0	0	2.54777	0	0	0	0	0	0	0	0	0	0	0	0	0	0	0	0	0.0524934	0	0	0	0	0	0	0	0	0	0
Escherichia	0	0	0	0	0	0	0	0	0.0102659	0	0	0	0	0	0.386972	0	0	0	0	0.0319795	0	0	0	0	0.099453	0	0	0	0.114877	0.487409	0	0.0381534
Eubacterium	0	0.238176	0.121175	0	0	26.6707	0.253593	0.161355	0	0	0.0703482	0.167738	0.164474	0.311526	0	0	0	0	0.189825	0.223857	0	0.0524934	0	0.206718	0.198906	0	0	0	0.516944	0.731113	0	0.0381534
Exiguobacterium	0	0	0	0	1.91083	0	0	0	0	0	0	0	0	0	0.806192	0	1.31579	0	0	0	0	0	0	0	0	0	0	0	0	0	0	0
Faecalibacterium	0	0.0340252	0	0	0	0	0.0422654	0.121017	0	0	0	0	0.0328947	0	0	0	0	0	0	0	0	0	0	0.0516796	0.099453	0	0	0	0.114877	0.243704	0	0
Ferribacterium	10.5263	0	0	0	0	0	0	0	0	0	0	0	0.0986842	0	0	0	0	0	0	0	0	0	0	0.0516796	0	0	0	0	0	0	0	0
Ferrithrix	0	0	0	0	0	0	0	0	0	0	0	0	0	0	0	0	0	0	0.0379651	0.0319795	0	0	0	0	0	0	0	0	0	0	0	0
Fibrisoma	0	0	0	0	0	0	0.0422654	0	0	0	0	0	0	0	0	0	0	0	0	0	0	0	0	0	0	0	0	0	0	0	0	0
Filomicrobium	0	0	0	0	0	0	0	0	0	0	0	0	0.0657895	0	0	0	0	0	0	0	0	0	0	0	0	0	0	0	0	0	0	0
Fischerella	0	0	0	0	0	0	0	0	0	0	0	0.0279564	0	0	0	0	0	0	0	0	0	0	0	0	0	0	0	0	0	0	0	0
Flavisolibacter	0	0.136101	0.0302939	0	0	0	0.676247	0.201694	0	0	0	0.587084	0.164474	0	0.0644953	0.236718	0	0	0.379651	0	0.0428853	0	0	0.310078	0.14918	0	0	0	0.574383	0.243704	0	0
Flavobacteriaceae genus	0	0	0	0	0	0	0	0	0	0	2.56771	0	0	0	0	0	0.219298	0	0	0	0	0	2.53118	0	0	0	0	0	0	0	0	0.0381534
Flavobacterium	0	0	0	0	0	0	0.0845309	0.0403388	0	1.80723	0	0.30752	0.197368	0	0	0	0.219298	0	0.0379651	0	0	0.0524934	0	0	0.099453	0	0.192123	0	0.34463	0.16247	0	0.0763068
Flexibacter	0	0.0340252	0	0	0	0	0.0422654	0.0806777	0	0	0	0.335477	0.296053	0	0	0.236718	0.657895	0	0.0379651	0	0.377391	0	0	0	0	0	0.0384246	0	0.114877	0	0	0
Flexibacter Sphingobacteriaceae	0	0.0680504	0	0	0	0	0	0	0	0	0	0	0	0	0	0	0	0	0	0	0	0	0	0	0	0	0	0	0	0	0	0
Flexibacteraceae	0	0	0	0.0854388	0	0	0	0	0	0	8.37144	0	0	0	0	0	0	0	0	0	0	0	0	0	0.0497265	0	0	0	0	0	0	0
Flexithrix	0	0	0	0	0	0	0	0	0	0	0	0	0	0	0	0	0	0	0.0379651	0	0	0	0	0	0	0	0	0	0.0574383	0	0	0
Fluviicola	0	0.0680504	0	0	0	0	0	0.0403388	0	0	0	0	0	0	0	0	0	0	0.0759301	0	0	0	0	0	0	0	0	0	0.0574383	0	0	0
Folliculinopsis	0	0	0	0	0	0	0	0	0	0	0	0	0	0	0	0	0	0	0	0	0	0.472441	0	0	0	0	5.53314	0	0	0	0	0
Frankia	0	0.340252	0.212057	0	1.27389	0	0.169062	0.201694	0.0102659	0	0	0	0	0	0	0	0	0	0	0.0959386	0	0	0	0	0	0	0	0	0	0	0	0
Frankiaceae genus	0	0	0.0302939	0	0	0	0.0422654	0.121017	0	0	0	0	0.0657895	0	0	0	0	0	0.113895	0.287816	0.64328	0	0	0.0516796	0	0	0.0384246	0	0	0.0812348	0	0.0381534
Frigoribacterium	0	0	0	0	0.636943	0	0	0	0	1.20482	0	0	0	0	0	0	0	0	0	0	0.403122	0	0	0	0	0	0	0	0	0	0	0
Fulvimarina	0	0	0	0	0	0	0	0.0403388	0	0	0	0	0	0	0	0	0	0	0.0379651	0	0	0	0	0	0	0	0	0	0	0	0	0
Fusobacterium	0	0	0	0	0.636943	0	0	0	0	0	0	0	0	0	0	0	0	0	0	0	0	0.0524934	0	0	0	0	0	0	0	0	4.40529	0
Geitlerinema	0	0	0	0	0	0	0	0	0	0	0	0	0	0	0	0	0	0	0	0	0	0	0	0	0.0497265	0	0	0	0	0	0	0
Gelidibacter	0	0	0.242351	0	0	0	0.0422654	0.0403388	0	0	0	0	0	0	0	0	0	0	0	0	0	0	0	0	0.099453	0	0	0	0	0	0	0
Gelria	0	0.0340252	0.0908816	0	0	0	0.0422654	0.0403388	0	0	0	0	0.0328947	0	0	0	0	0	0.0379651	0	0	0	0	0	0	0	0	0	0	0.0812348	0	0
Gemella	0	0	0	0	0	0	0	0	0	0	0	0	0	0	0	0	0	0	0	0	0.0514624	0	0	0	0	0	0	0	0	0	0	0
Gemmata	0	0.646478	0.424114	0	0	0	0.676247	0.36305	0	0	0	0.167738	0.131579	0	0	0	0	0	0.493546	0.479693	0	0.0524934	0	0.465116	0.298359	0	0	0	0.229753	0.487409	0	0
Gemmatimonas	0	3.98095	2.05998	0	1.27389	0	2.62046	1.00847	0	0	0	0.279564	1.05263	0	0	0.394529	0	0	2.12604	0.607611	0.0257312	0	0	1.24031	1.04426	0.144858	0	0	1.26364	1.54346	0	0
Geobacillus	0	0	0	0	0	0	0	0	0	0	0	0	0	0	0	20.3314	0	0	0	0	0	0	0	0.981912	1.19344	0	0.0384246	0	0	0	0	0
Geobacter	0	0.0340252	0.0605877	0	0	0	0.169062	0.36305	0	0	0	0.0559128	0.427632	0	0	0	0	0	0.15186	0.0639591	0	0	0	0.516796	0.348086	0	0.0576369	0	0.34463	0.731113	0	0
Geodermatophilaceae genus	0	0	0	0	0	0	0	0.0806777	0	0	0	0.0559128	0.0328947	0	0	0	0	0	0	0	0	0	0	0.0516796	0.198906	0	0	0	0	0	0	0
Geodermatophilus	0	0.0680504	0	0	0	0	0.0845309	0.0806777	0	0	0	0.0279564	0.394737	0	0	0	0	0	0.0379651	0.191877	0	0	0	0.258398	0.447539	0	0.0576369	0	0	0.0812348	0	0
Geopsychrobacter	0	0.272201	0.333232	0	0	0	0.0845309	0.201694	0	0.60241	0	0.0279564	0.394737	0	0	0	0	0	0.0759301	0.191877	0.334506	0	0	0.155039	0.0497265	0	1.59462	0	0	0.243704	0	0
Georgenia	0	0	0	0	0	0	0	0	0	0	0	0	0	0	0	0	0	0	0	0	0	0	0	0	0	0.144858	0	0	0	0	0	0
Geothermobacter	0	0.102076	0.181763	0	0.636943	0	0.633981	0.927793	0	0	0	0.0838692	0.986842	0	0	0	0	0	0.607441	1.0873	0.669011	0	0	0.361757	0.099453	0	1.11431	0	0.861574	0.0812348	0	0
Gloeothece	0	0	0	0	0	0	0	0	0	0	0	0.195695	0	0	0	0	0	0	0	0	0	0	0	0	0	0	0	0	0	0	0	0
Gloeotrichia	0	0	0	0	0	0	0	0	0	0	0	0.0279564	0	0	0	0	0	0	0	0	0	0	0	0	0	0	0	0	0	0	0	0
Gordonia	0	0	0.0302939	0	0	0	0	0	0	0	0	0	0	0	0	0	0	0	0	0	0	0	0	0	0	0	0	0	0	0	0	0
Haemophilus	0	0.0680504	0	0	0	0	0	0	0	0	0	0	0	0	0	0	0	0	0	0	0	0	0	0	0	0	0	0	0.114877	0	0	0
Haliangium	0	0.0340252	0.0605877	0	0	0	0.0422654	0.0403388	0	0	0	0	0	0	0	0	0	0	0	0.0319795	0	0	0	0.0516796	0	0	0	0	0.114877	0	0	0
Haliscomenobacter	0	0	0	0	0	0	0	0	0	0	0	0.167738	0.0328947	0	0	0	0	0	0	0.0319795	0	0	0	0	0	0	0	0	0.0574383	0	0	0
Halobacillus	0	0	0	0	0	0	0	0	0	0	0	0	0.0328947	0	0	0	0	0	0	0	0	0	0	0	0	0	0	0	0	0	0	0
Halocella	0	0	0	0	0	0	0	0	0	0	0	0	0	0	0	0	0	0	0	0	0	0	0	0	0	0	0	0	0	0	0	0.0381534
Halochromatium	0	0	0	0	0	0	0	0	0	0	0	0	0	0	0	0	0	0	0	0	0	0	0	0	0	0	0.230548	0	0	0	0.440529	0
Halomicronema	0	0	0	0	0	0	0	0	0	0	0	0.0279564	0	0	0	0	0	0	0	0	0	0	0	0	0	0	0	0	0	0	0	0
Halomonas	0	0	0	0	0	0	0.0845309	0.0806777	0	0	0	0	0	0	0	0	0	0	0	0	0	0	0	0	0	0	0	0	0	0.0812348	0	0
Halothermothrix	0	0.952705	0.0908816	0	0	0	0.0422654	0.322711	0	0	0	0.0838692	0.0986842	0	0.128991	0	0	0	1.21488	0.415734	0	0	0	0.206718	0.298359	0	0	0	0.516944	0.243704	0	0.0381534
Helcococcus	0	0	0	0	0	0	0	0	0	0	0	0	0	0	0	0	0	0	0	0	0.0514624	0	0	0	0	0	0	0	0	0	0	0
Herbaspirillum	0	0	0	0	0	0	0.0845309	0	0	0	0	0.0279564	0.0657895	0	0.0644953	11.0994	0.219298	0	0	0	0	0	0	0	0.0497265	0	0	0	0.287191	0.16247	0	0
Herbidospora	0	0	0	0	0	0	0	0	0	0	0	0	0.0328947	0	0	0	0	0	0	0	0	0	0	0	0	0	0	0	0	0	0	0
Herpetosiphon	0	0	0	0	0	0	0	0	0	0	0	0.195695	0	0	0	0	0	0	0	0	0	0	0	0	0	0	0	0	0	0	0	0
Hippea	0	0.238176	0.0302939	0	0	0	0.0422654	0.0403388	0	0	0	0	0.0986842	0	0	0	0	0	0.15186	0.0639591	0.128656	0	0	0.0516796	0.0497265	0	0	0	0.229753	0.568643	0	0
Hoeflea	0	0	0	0	0	0	0	0	0	0	0	0	0	0	0	0.0263019	0	0	0	0	0	0	0	0	0	0	0	0	0	0	0	0
Holophaga	0	0.748554	0.151469	0	0	0	0.338123	0.282372	0	0	0	0.279564	0.164474	0	0	0	0	0	0.379651	0.67157	0	0	0	0.361757	0.447539	0	0	0	0.402068	0.568643	0	0
Holosporaceae genus	0	0	0	0	0	0	0	0.0806777	0	0	0	0	0	0	0	0.0263019	0	0	0	0	0	0	0	0	0	0	0	0	0.0574383	0	0	0
Hydrogenophaga	0	0	0	0	0	0	0	0	0	0	0	0	0	0	0	0.789058	0	0	0	0	0	0	0	0	0	0	0	0	0	0	0	0
Hydrogenophilus	6.14035	0	0	0	0	0	0	0	0	0	0	0	0	0	0	0	0	0	0	0	0	0	0	0	0	0	0	0	0	0	0	0
Hymenobacter	0	0	0	0	0	0	0.0422654	0	0	0	0.175871	0.0279564	0	0	0	0	0	0	0	0	0	0	0	0	0	0	0	0	0	0	0	0
Hyphomicrobiaceae genus	0	0	0	0	0	0	0	0	0	0	0	0	0	0	0	0	0	0	0	0	0	0	0	0	0	0	0	3.54545	0	0	0	0
Hyphomicrobium	0	1.19088	0.333232	0	0	0	0.211327	0.201694	0	0	0	0.0559128	0.394737	0	0	0	0	0	0.189825	0.383754	0	0	0	0.465116	0.248633	0	0	2.18182	0.34463	0.243704	0	0
Iamia	0	0.102076	0.121175	0	0	0	0.0845309	0.0806777	0	0	0	0.0279564	0.0657895	0	0.128991	0	0	0	0	0.0319795	0.0686165	0	0	0.0516796	0.0497265	0	0	0	0.229753	0.0812348	0	0
Ideonella	0	0.0680504	0	0	0	0	0	0.201694	0	0	0	0.139782	0.0328947	0	0	0	0	0	0	0	0	0	0	0	0	0	0	0	0.0574383	0	0	0
Ignatzschineria	0	0	0	0	0	0	0	0	0	0	0	0	0	0	0.386972	0	0	0	0	0	0	0	0	0	0	0	0	0	0	0	0	0
Ilumatobacter	0	0.0340252	0.151469	0	0	0	0.0845309	0	0	0	0	0	0.0328947	0	0.0322477	0	0.219298	0	0.0379651	0.0319795	0	0	0	0.0516796	0.348086	0	0	0	0.172315	0	0	0
Inquilinus	0	0	0.0302939	0	0	0	0.0422654	0.0806777	0	0	0	0	0	0	0	0	0	0	0.113895	0.127918	0	0	0	0	0	0	0	0	0.0574383	0	0	0
Isoptericola	0	0	0	0	0	0	0.0422654	0	0	0	0	0	0	0	0	0	0	0	0	0	0	0	0	0	0	0.0482859	0	0	0	0	0	0
Isosphaera	0	0.0680504	0.0302939	0	0	0	0.0422654	0.121017	0	0	0	0.0559128	0.0986842	0	0	0	0	0	0.569476	0.127918	0	0	0	0.155039	0	0	0	0	0.114877	0	0	0
Janthinobacterium	0	0	0	0	0	0	0	0	0	0	0	0	0	0	0	3.62967	0.438596	0	0	0	0	0	0	0	0.0497265	0	0.0192123	0	0	0.0812348	0	0
Jiangella	0	0	0	0	0	0	0	0.0403388	0	0	0	0	0	0	0	0	0	0	0	0	0	0	0	0	0	0	0	0	0	0	0	0
Kaistibacter	0	0	0	0	0	0	0	0	0	0	0	0	0	0	0	0	0	0	0	0	0.0343083	0	0	0	0	0	0	0	0	0	0	0
Kaistobacter	0	0	0.0605877	0	0	0	0	0.0806777	0	0	0	0.0279564	0.164474	0	0	0	0	0	0.0379651	0	0	0	0	0.206718	0.099453	0	0	0	0	0.0812348	0	0
Kibdelosporangium	0	0.0680504	0.0302939	0	0	0	0.0845309	0.403388	0	0	0	0	0	0	0	0	0	0	0	0.0319795	0	0	0	0.0516796	0	0	0	0	0.114877	0.16247	0	0
Kineococcus	0	0	0	0	0	0	0	0	0	0	0	0	0	0	0	0	1.97368	0	0	0.0319795	0	0	0	0	0	0.0482859	0	0	0	0	0	0
Kineosporia	0	0	0	0	0	0	0.126796	0.0403388	0	0	0	0	0.0657895	0	0	0	0.438596	0	0.0379651	0	0	0	0	0	0	0	0	0	0	0	0	0
Kineosporiaceae genus	0	0	0	0	0	0	0.338123	0.161355	0	0	0	0.0279564	0.394737	0	0	0	0.657895	0	0.0759301	0.0639591	0	0	0	0.103359	0.298359	0	0	0	0.229753	0	0	0
Kingella	0	0	0	0	0	0	0	0	0	0	0.0351741	0	0	0	0	0	0	0	0	0	0	0	0	0	0	0	0	0	0	0	0	0
Kitasatospora	0	0	0	0	0	0	0	0	0	0	0	0	0.230263	0	0	0	0	0	0.0759301	0.0639591	0	0	0	0	0	0.193143	0	0	0	0	0	0
Klebsiella	0	0	0	0	0	0	0	0	0	0	0	0	0	0	0	0	0	0	0	0	0	0	0	0	0	0	0	0	0.287191	0	0	1.48798
Kocuria	0	0	0	0	0	0	0	0	0	0	0	0	0	0	0	0	0	0	0	0	0	0	0	0	0.0497265	0	0	0	0	0	0	0
Kofleria	0	0	0	0	0	0	0	0	0	0	0	0	0	0	0	0	0	0	0	0	0	0	0	0	0.0497265	0	0	0	0	0	0	0
Kordia	0	0	0	0	0	0	0	0	0	0	0	0	0	0	0	0	0	0	0.113895	0	0	0	0	0	0	0	0	0	0	0	0	0
Koukoulia	0	0	0	0	0	0	0	0	0	0	0	0	0	0	0.612706	0	0	0	0	0	0	0	0	0	0	0	0	0	0	0	0	0
Kouleothrix	0	0.238176	0.0605877	0	0	0	0.126796	0.161355	0	0	0	0.866648	0.230263	0	0.0322477	0	0	0	0.0759301	0.767509	0	0.0524934	0	0	0	0	0	0	0	0.0812348	0	0
Krasilnikovia	0	0	0	0	0	0	0	0	0	0	0	0	0.0657895	0	0	0	0	0	0	0.0319795	0	0	0	0.0516796	0	0	0	0	0.172315	0	0	0
Kribbella	0	0	0	0	0	0	0.126796	0.0806777	0	0	0	0	0.131579	0	0	0	0.438596	0	0.0759301	0.0319795	0	0.262467	0	0	0.0497265	0	0	0	0	0	0	0
Ktedonobacter	0	0.0340252	0.121175	0	0	0	0.126796	0.0806777	0	0	0	0	0.0328947	0	0	0	0	0	0.0759301	0.159898	0.111502	0	0	0	0.0497265	0	0	0	0.172315	0.406174	0	0
Kurthia	0	0	0	0	0	0	0	0	0	0	0	0	0	0	0.257981	0	0	0	0	0	0	0	0	0	0	0	0	0	0	0	0	0
Labrenzia	0	0	0	0	0	0	0.0422654	0	0	0	0	0	0	0	0	0	0	0	0	0	0	0	0	0	0	0	0	0	0	0	0	0
Labrys	0	0	0	0	0	0	0	0.121017	0	0	0	0.0559128	0	0	0	0	0	0	0	0	0	0	0	0.103359	0	0	0	0	0	0	0	0
Laceyella	0	0	0	0	0	0	0	0	0	0	0	0	0.0328947	0	0	0	0	0	0	0	0	0	0	0.465116	0.497265	0	0	0	0	0	0	0
Lachnobacterium	0	0	0	0	0	0	0	0	0	0	0	0	0	0	0	0	0	0	0	0	0	0	0	0	0	0	0	0	0	0.0812348	0	0
Lachnospiraceae genus	0	0	0	0	0	0	0	0	0	0	0	0	0	0	0	0	0	0	0	0	0	0	0	0.103359	0	0	0	0	0	0.243704	0	0
Lactobacillus	0	0	0	0	0	0	0	0	0	1.20482	0	0	0	0	0	0	0	0	0	0	0	0	0	0	0	0	11.3737	0	0	0	0	0
Lactococcus	24.5614	0	0	0	0	0	0	0	0	0	0	0	0	0	0.128991	0	0	0	0	0	0.29162	90.6037	0	0	0	0	0	0	0.114877	0	0	4.15872
Larkinella	0	0	0	0	0	0	0	0	0.0102659	0	0	0	0	0	0	0	0	0	0	0	0	0	0	0	0	0	0	0	0	0	0	0
Leahibacter	0	0	0	0	0	0	0	0	0	0	0	0	0.0328947	0	0	0	0	0	0	0	0	0	0	0	0	0	0	0	0	0	0	0
Lechevalieria	0	0.0340252	0	0	0	0	0.0422654	0	0	0	0	0	0.0328947	0	0	0	0	0	0.0379651	0.351775	0	0	0	0	0	0	0	0	0	0	0	0
Leclercia	0	0	0	0	0	0	0	0	0	0	0	0	0	0	0	0	0	0	0	0	0	0	0	0	0	0	0	0	0	0	0	0.572301
Legionella	0	0	0	0	0	0	0.0422654	0	0	0	0	0	0	0	0	0	0	0	0	0.255836	0	0	0	0	0	0	0	0	0	0	0	0
Leifsonia	0	0	0	0	0	0	0	0.0403388	0	0	0	0	0	0	0.0322477	0	0	0	0	0	0.197272	0	0	0	0.0497265	0.0482859	0	0	0.114877	0	0	0
Lentisphaera	0	0.0340252	0.0302939	0	0	0	0	0.0806777	0	0	0	0	0	0	0	0	0	0	0.0759301	0	0	0	0	0	0	0	0	0	0	0	0	0
Lentzea	0	0	0	0	0	0	0	0.0403388	0	0	0	0	0	0	0	0	0	0	0	0	0	0	0	0	0	0	0	0	0	0	0	0
Leptolyngbya	0	0	0	0	0	0	0.169062	0	0	0	0	9.617	0	0	0	0	0	0	0	0	0	0	0	0	0	0	0	0	0	0	0	0
Leptothrix	0	0	0	0	0	0	0	0	0	0	0	0.30752	0.0328947	0	0	0	0	0	0	0	0	0	0.0366838	0	0.0497265	0	0.288184	0	0	0	0	0
Leucobacter	0	0	0	0	0	0	0	0	0	0	0	0	0	0	0.580458	0	0	0	0	0	0	0	0	0	0	0	0	0	0	0	0	0
Leuconostoc	0	0	0	0	0	0	0	0	0	0	0	0	0	0	0	0	0	0	0	0	0.557509	0	0	0	0	0	0	0	0	0	0	0
Levilinea	0	1.53113	0.908816	0	0	0	1.26796	0.766438	0	0	0	0.391389	1.21711	0	0	0	0.438596	0	1.86029	0.863447	0	0	0	1.29199	2.08851	0.289715	0.403458	0	0.861574	0.649878	0	0
Listeria	0	0	0	0	0	0	0	0	0	0	0	0	0	0	0	0	0	0	0	0	0	0.419948	0	0	0	0	0	0	0	0	0	0
Loktanella	0	0	0	0	0	0	0	0	0	0	0	0	0	0	0	0	0	0	0	0	0	0	0	0	0	0	2.22863	0	0	0	0	0
Luedemannella	0	0	0	0	0	0	0.0422654	0	0	0	0	0	0	0	0	0	0	0	0.0379651	0.0639591	0	0	0	0.0516796	0	0	0	0	0.0574383	0	0	0
Luteibacter	0	0	0	0	0	0	0	0	0.0102659	0	0	0	0	0	0	0	0	0	0	0	0	0	0	0	0	0	0	0	0	0	0	0
Lutibacterium	0	0	0	0	0	0	0	0	0	0	0	0	0	0	0	0.341925	0	0	0	0	0	0	0	0	0	0	0	0	0	0	0	0
Lyngbya	0	0	0	0	0	0	0	0	0	0	0	0.279564	0.0328947	0	0	0	0	0	0	0	0	0	0	0	0	0	0	0	0	0	0	0
Lysinibacillus	0	0	0	0	0	0	0	0.0806777	0	0	0	0	0.230263	0	0	0	0	0	0	0.0639591	0	0	0	0.0516796	0	0	0	0	0	0	0	0
Lysobacter	0	0.0340252	0	0	0	0	0	0.0806777	0	0	0	0	0.164474	0	0	1.18359	0	0	0	0	0.180118	0	0	0	0	0	0	0	0	0.243704	0	0
Macromonas	0	0.0340252	0.0605877	0	0	0	0	0	0	0	0	0	0	0	0	0	0	0	0.15186	0.351775	0.0171541	0	0	0.103359	0.0497265	0	0	0	0.0574383	0	0	0
Magnetospirillum	0	0	0	0	0	0	0	0.0403388	0	0	0	0	0	0	0	0	0	0	0	0	0	0	0	0	0	0	0	0	0	0	0	0
Malikia	0	0	0	0	0	1.76185	0	0	0	0	0	0	0	0	0	0	0	0	0	0	0	0	0	0	0	0	0	0	0	0	0	0
Maricaulis	0	0.0340252	0	0	0	0	0	0	0	0	0	0	0	0	0	0	0	0	0	0.0319795	0	0	0	0	0	0	0	0	0	0	0	0
Marinithermus	0	0	0	0	0	0	0.0422654	0	0	0	0	0.0559128	0	0	0	0	0	0	0	0	0	0	0	0	0	0	0	0	0	0	0	0
Marmoricola	0	0.0340252	0.242351	0.0244111	0	0	0.126796	0.242033	0	1.80723	0	0.0279564	0.460526	7.78816	0.290229	5.4445	4.38596	0	0	0.0639591	9.82074	0	0	0.103359	0.14918	9.99517	0.0192123	0	0	0	0	0
Massilia	0	0	0	0	0	0	0	0	0	0.60241	0	0	0.0328947	0	0	0	1.53509	0	0	0.0319795	0	0	0	0	0.0497265	0	0	0	0.172315	0	0	0
Melittangium	0	0.0340252	0	0	0	0	0	0	0	0	0	0	0	0	0	0	0	0	0	0	0	0	0	0	0	0	0	0	0	0	0	0
Mesorhizobium	0	0.0340252	0.0302939	0	0	0	0.0845309	0.0403388	0	0	0	0	0	0	0	16.0179	0	0	0.0379651	0	0	0	0	0	0	0	0	0	0	0	0	0
Methylibium	0	0	0	0	0	0	0	0	0	0	0	0.167738	0.0986842	0	0	1.78853	0	0	0	0	0	0	0	0	0	0	0	0	0	0	0	0
Methylobacter	0	0	0	0	0	0	0	0	0	0	0	0	0	0	0	0	0	0	0	0	0	0	0	0	0	0	0.0192123	0	0	0	0	0
Methylobacteriaceae genus	0	0	0	0	0	0	0	0	0	0	0	0.111826	0	0	0	0	0.219298	0	0	0	0	0	0	0	0	0	0	0	0	0	0	0
Methylobacterium	0	0	0.0302939	0	0	0	0.211327	0.605083	0	3.61446	0	0.615041	0.328947	1.24611	0.0644953	0	2.41228	0	0	0.0319795	0	0	0	0.361757	1.04426	0	0	0	0.0574383	0	0	0
Methylocaldum	0	0.0680504	0	0	0	0	0	0	0	0	0	0	0.0328947	0	0	0	0	0	0.0379651	0.0319795	0	0	0	0	0	0	0	0	0	0	0	0
Methylocapsa	0	0.0340252	0.0605877	0	0	0	0.0845309	0.0403388	0	0	0	0.0559128	0.263158	0	0	0	0	0	0.0759301	0.0319795	0	0	0	0.361757	0	0	0	0	0.0574383	0	0	0
Methylococcaceae genus	0	0	0	0	0	0	0.253593	0.484066	0	0	0	0.0838692	0.230263	0	0	0	0	0	0	0	0	0	0	0.516796	1.6907	0	0.960615	0	0.0574383	0.0812348	0	0
Methylococcus	0	0.0340252	0.0302939	0	0	0	0.295858	0.161355	0	0	0	0	0.131579	0	0	0	0	0	0	0	0	0	0	0.0516796	0	0	0	0	0.114877	0	0	0
Methylocystis	0	0	0.0302939	0	0	0	0.0422654	0.121017	0.0102659	0	0	0.0279564	0	0	0	0	0	0	0	0.127918	0	0	0	0.0516796	0	2.26944	0	0	0	0	0	0
Methylohalobius	0	0	0	0	0	0	0	0	0	0	0	0	0	0	0	0	0	0	0	0	0.0600395	0	0	0	0	0	0	0	0	0	0	0
Methylophilus	0	0	0	0	0	0	0	0	0	0	0	0	0	0	0	0	0	0	0	0.0639591	0	0	0	0	0	0	0	0	0	0	0	0
Methylosinus	0	0.0340252	0.0908816	0	0	0	0.0845309	0	0	0	0	0.111826	0	0	0	0	0	0	0.0759301	0	0	0	0	0	0	0	0	0	0	0	0	0
Methylotenera	0	0	0	0	0	0	0	0	0	0	0	0	0	0	0	0	0	0	0	0	0	0.0524934	0	0	0	0	0	0	0	0	0	0
Methylothermus	0	0	0.0302939	0	0	0	0.0422654	0.0403388	0	0	0	0	0	0	0	0	0	0	0.0759301	0.0639591	0	0	0	0	0	0	0	0	0	0	0	0
Microbacteriaceae genus	0	0	0	0	0	0	0	0	0	0	0	0	0	0	0	0	0	0	0	0	0	0	0	0	0.0497265	0	0	0	0	0	0	0
Microbacterium	0	0	0	0	0	0	0.0422654	0	0	6.0241	0	0.195695	0.0328947	0	0	0	5.48246	0	0	0	0	0	0	0	0.14918	0.386287	0	0	0	0	0	0.0763068
Microbispora	0	0.102076	0.0605877	0	0	0	0.295858	0.403388	0	0	0	0.0559128	0.197368	0	0	0	0	0	0	0	0	0	0	0	0	0	0	0	0.114877	0	0	0
Micrococcus	0	0	0.0605877	0	0	0	0	0.0403388	0	0	0	0	0.0328947	0	0	0	0	0	0.22779	0.0319795	0	0	0	0	0	0	0	0	0	0.0812348	0	0
Microcoleus	0	0	0	0	0	0	0.422654	0	0	0	0	10.2041	0.296053	0	0	0	0	0	0	0	0	0	0	0	0	0	0	0	0	0	0	0.0763068
Microlunatus	0	0	0	0	0	0	0.169062	0.887455	0	0	0	0.0279564	0.592105	0	0	0	0.219298	0	0.0379651	0	0	0	0	0.206718	0.497265	0	0.134486	0	0.172315	0.16247	0	0.0381534
Micromonospora	0	0.102076	0.181763	0	0	0	0.549451	0.242033	0	0	0	0.0559128	0.526316	0	0	0	0	0	0.341686	0.383754	0	0	0	0.361757	1.34262	0	0	0	0.459506	0.0812348	0	0.0381534
Micromonosporaceae genus	0	0.306227	0.121175	0	0	0	0.0422654	0.766438	0	0	0	0.30752	0.230263	0	0	0	0	0	0.0759301	0.255836	0	0	0	0.103359	0.795624	0	0	0	0.0574383	0.16247	0	0
Microscilla	0	0	0	0.0122055	0	0	0	0	0	0	0	0	0	0	0	0	0	0	0	0	0	0	0	0	0	0	0	0	0	0	0	0
Microvirga	0	0.136101	0.0908816	0	0	0	0.718512	1.41186	0	0	0	0.615041	1.18421	0	0	0	0.219298	0	0	0.159898	0.00857706	0	0	1.24031	2.13824	0	0	0	0.689259	0	0	0.0763068
Mitsuaria	0	0	0	0	0	0.9113	0	0	0	0	0.0703482	0	0.0328947	0	0	0	0.438596	0	0	0	0	0.104987	0	0	0	0	0	0	0	0	0	0
Modestobacter	0	0.0340252	0	0	0	0	0	0	0	0	0	0.0279564	0.0328947	0	0	0	0	0	0	0	0	0	0	0.206718	0	0	0	0	0	0	0	0
Moellerella	0	0	0	0	0	0	0	0	0	0	0	0	0	0	29.4099	0	0	0	0	0	0	0	0	0	0	0	0	0	0	0	0	0
Moorella	0	0	0	0	0	0	0	0	0	0	0	0	0	0	0	0	0	0	0	0	0	0	0	0	0	0	0	0	0	0	0	0.0381534
Moraxellaceae genus	0	0	0	0	0	0	0	0	0	0	0	0	0	0	0	0	2.85088	0	0	0	0	0	0.0366838	0	0	0	0	0	0	0	0	0
Morganella	0	0	0	0	0	0	0	0	0	0	0	0	0	0	2.12835	0	0	0	0	0	0	0	0	0	0	0	0	0	0	0	0	0
Moritella	0	0	0	0	0	0	0	0	0	0	0	0	0	0	0	0	0	0	0	0.127918	0	0	0	0	0	0	0	0	0	0	0	0
Mucilaginibacter	0	0	0	0	0	0	0	0.0403388	0	0	0	0	0	0	0	0	0	0	0	0	0	0	0	0	0	0	0	0	0	0	0	0
Myceligenerans	0	0	0	0	0	0	0	0	0	0	0	0	0	0	0	0	0	0	0	0	0	0	0	0	0	0	0	0	0	0	0	0.0763068
Mycobacteriaceae genus	0	0	0.181763	0	0	0	0	0.0806777	0	0	0	0	0.361842	0	0	0	0	0	0.0759301	0.0959386	0	0	0	0	0	0	0.0384246	0	0	0.0812348	0	0
Mycobacterium	0	1.87138	5.54377	0.0732332	0	0	1.47929	3.87253	0.0102659	0	0	0.754822	3.45395	0.778816	0	1.02578	0	0	1.59453	4.02942	3.26786	0	0	2.68734	1.54152	0.338001	0.537944	0	1.2062	0.649878	0.440529	0
Myxococcaceae genus	0	0	0	0	0	0	0	0.0403388	0	0	0	0	0	0	0	0	0	0	0	0	0	0	0	0	0	0	0	0	0	0	0	0
Myxococcales genus	0	0.170126	0.0302939	0	0	0	0.338123	0.0806777	0	0	0	0	0.0657895	0	0	0	0	0	0.0759301	0	0	0	0	0.206718	0.14918	0	0.67243	0	0.0574383	0.0812348	0	0
Myxococcus	0	0.0340252	0	0	0	0	0.0422654	0.0403388	0	0	0	0	0	0	0	0	0	0	0.0379651	0	0	0	0	0	0	0	0	0	0	0	0	0
Nakamurella	0	0	0	0	0	0	0	0	0	0	0	0.0838692	0.0657895	0	0	0	0	0	0	0	0	0	0	0	0	0	0	0	0	0	0	0
Nannocystis	0	0	0	0	0	0	0.211327	0.0403388	0	0	0	0.0559128	0	0.778816	0	0	1.53509	0	0	0.0319795	0	0	0	0.0516796	0	0	0	0	0	0	0	0
Neisseria	0	0	0	0	0	0	0	0	0	0	0.668308	0	0.0328947	0	0	0	0	0	0	0	0	0	0	0	0	0	0	0	0	0	0	0
Nevskia	0	0	0	0	0	0	0	0.0403388	0	0	0	0	0	0	0	0	0	0	0	0	0	0	0	0	0	0	0	0	0	0	0	0
Niastella	8.33333	0.102076	0	0	0	0	0.0422654	0	0	0	0	0.363433	0.131579	0	0	0.0263019	0	0	0	0.0319795	0.0343083	0	0	0.0516796	0.099453	0	0.153698	0	0.172315	0	0	0
Nitratireductor	0	0	0	0	0	0	0	0	0	0	0	0	0.0328947	0	0	0	0	0	0	0	0	0	0	0	0	0	0	0	0	0	0	0
Nitrobacter	0	0	0	0	0	0	0.0845309	0	0	0	0	0	0	0	0	0	0	0	0	0	0	0	0	0.0516796	0	0	0	0	0	0	0	0
Nitrosococcus	0	0.102076	0.0605877	0	0	0	0	0	0	0	0	0	0.0328947	0	0	0	0	0	0	0	0	0	0	0	0	0	0	0	0	0.0812348	0	0
Nitrosomonas	0	0	0	0	0	0	0.0845309	0	0	0	0	0	0	0	0	0	0	0	0	0	0	0	0	0	0	0	0	0	0	0	0	0
Nitrosospira	0	0	0	0	0	0.18226	0	0	0	0	0	0	0.0328947	0	0	0	0	0	0.0379651	0	0	0	0	0	0	0	0	0	0	0	0	0
Nitrosovibrio	0	0.952705	0.454408	0	0	0	0.295858	0.524405	0	0	0	0.0279564	0.263158	0	0	0	0.219298	0	0.455581	0.159898	2.06707	0	0	2.0155	0.497265	0	0	0	0.804136	0.324939	0	0
Nitrospira	0	1.15686	0.151469	0	0	0	0.760778	1.08915	0	0	0	0.0279564	0.657895	0.155763	0	0	0	0	1.13895	0.159898	0	0	0	0.310078	0.497265	0	0	0	1.32108	1.29976	0	0
Nocardia	0	0	0	0	0	0	0	0.161355	0	0	0	0	0	0	0	0	0	0	0	0	0	0	0	0	0	0	0	0	0	0	0	0
Nocardioidaceae genus	0	0	0.0908816	0.0244111	0	0	0	0	0	0	0	0	0.0328947	4.82866	0	3.57706	1.75439	0	0	0.0319795	17.9432	0	0.0366838	0	0.099453	26.1709	0.691643	0	0	0	4.40529	0.0381534
Nocardioides	0	0.0340252	0.242351	0	5.09554	0	0.380389	0.524405	0.0205318	3.01205	0	0.139782	0.559211	5.45171	0.483715	0.0526039	2.63158	0	0	0.639591	27.0263	0.262467	0	0.206718	1.29289	4.7803	0.0384246	0	0.229753	0.16247	0.440529	0.0763068
Nocardiopsaceae genus	0	0	0	0	0	0	0	0	0	0	0	0	0.0328947	0	0	0	0	0	0	0	0	0	0	0	0	0	0	0	0	0	0	0
Nodularia	0	0	0	0	0	0	0.0422654	0.161355	0	0	0	0.503215	0	0	0	0	0	0	0	0	0	0	0	0	0	0	0	0	0	0	0	0
Nonomuraea	0	0.0680504	0.0605877	0	0	0	0.126796	0	0	0	0	0	0.230263	0	0	0	0	0	0.0379651	0.0639591	0.00857706	0	0	0.103359	0.0497265	0	0	0	0.0574383	0.0812348	0	0
Nordella	0	0	0	0	0	0	0.0845309	0	0	0	0	0	0	0	0	0	0	0	0.0379651	0.0639591	0	0	0	0	0	0	0	0	0.0574383	0	0	0
Nostoc	0	0	0	0	0	0	0.126796	0.121017	0	0	0	2.71177	0.0328947	0	0	0	0	0	0	0	0	0	0	0	0	0	0	0	0	0	0	0
Novosphingobium	0	0	0.0302939	0	0	0	0.0422654	0.0403388	0	0	0	0.531171	0.0328947	0	0	0	0.219298	0	0.0759301	0	0	0	0	0	0	0	0	0	0.172315	0.0812348	0	0
Oceanicola	0	0	0	0	0	0	0	0.0806777	0	0	0	0	0.0328947	0	0	0	0	0	0	0	0	0	0	0	0	0	0	0	0	0	0	0
Ochrobactrum	0	0	0	0	0	0	0	0	0	0	0	0	0	0	0	0	0	0	0	0	0	0	0	0	0	0	0	0	0	0	0.440529	0
Oleomonas	0	0.0340252	0.0302939	0	0	0	0.338123	0.36305	0	1.20482	0	0.0279564	0.296053	0	0	0	0	0	0.189825	0.255836	0	0	0	0.103359	0.248633	0	0	0	0.0574383	0.16247	0	0
Opitutus	0	0.544403	0.121175	0	0	0	1.26796	1.00847	0	0	0	0.726866	0.328947	0	0	0	0	0	0.303721	0.191877	0	0.314961	0	0.310078	0.0497265	0	0	0	0.229753	0.324939	0	0
Ornithinicoccus	0	0	0	0	0	0	0	0	0	0	0	0	0.0657895	0	0	0	0	0	0	0	0	0	0	0	0	0	0	0	0	0	0	0
Oscillatoria	0	0	0	0	0	0	0.507185	0	0	0	0	3.85798	0	0	0	0	0	0	0	0	0	0	0	0	0	0	0	0	0	0	0	0
Oscillatoriales genus	0	0	0	0	0	0	0.0845309	0	0	0	0	2.76768	0	0	0	0	0	0	0	0	0	0	0	0	0	0	0	0	0	0	0	0
Oscillochloris	0	0.0340252	0	0	0	0	0.126796	0.0403388	0	0	0	0.391389	0.197368	0	0	0	0	0	0.0379651	0	0	0	0	0.0516796	0.099453	0	0	0	0	0	0	0
Ottowia	0	0	0	0	0	0	0	0	0	0	0	0	0	0	0	0	0	0.925926	0	0.0319795	0	0	0	0	0	0	0	0	0	0	0	0
Oxalobacteraceae genus	0	0	0	0	0	0	0	0	0	0	0	0.0279564	0	0	0	0	1.09649	0	0	0	0	0	0	0	0	0	0	0	0	0	0	0
Paenibacillaceae genus	0	0.0680504	0.0302939	0	0	0	0.0422654	0	0	0	0	0	0.0657895	0	1.16092	0	0	0	0.379651	0.223857	0	0	0	0.206718	0.099453	0	0	0	0.172315	0	0	0.0381534
Paenibacillus	0	0.306227	0.484702	0.0122055	1.27389	0	0.507185	0.36305	0.0102659	0.60241	0	0.419346	0.789474	0	0.386972	0	0.219298	0	1.44267	0.639591	0.0257312	0	0	2.22222	1.14371	0	0	0	0.574383	0	0	0.0381534
Pantoea	0	0	0	0	6.36943	0	0	0	0	0	0	0.0559128	0	0.155763	0	0	6.35965	0	0	0	0	0.209974	0	0	0	0	0	0	0	0	0	0.190767
Parabacteroides	0	0.374277	0	0	0	0	0	0	0	0	0	0	0	0	0	0	0	0	0	0	0	0	0	0	0	0	0	0	0	0	0	0
Paracoccus	0	0	0	0	0	0	0	0	0	0	0	0.0279564	0.0328947	0	0	0	0	0	0	0	0.00857706	0	0	0	0	0	0.24976	0	0	0	0	0
Paracraurococcus	0	0	0	0	0	0	0	0.0806777	0	0	0	0.251607	0.0657895	0	0	0	0	0	0	0	0.162964	0	0	0	0.0497265	0	0.0192123	0	0	0	0	0
Parvibaculum	0	0.0340252	0.0302939	0	0	0	0	0.0403388	0	0	0	0.279564	0.0328947	0	0	0	0	0	0	0.0959386	0	0.0524934	0	0	0.0497265	0.0482859	0	0	0	0	0	0
Parvularcula	0	0	0	0	0	0	0	0	0	0	0	0	0.0328947	0	0	0	0	0	0	0	0	0	0	0	0	0	0	0	0	0	0	0
Patulibacter	0	18.5097	22.8416	0	0	0	10.1437	4.71965	0	1.80723	0	0.447302	6.18421	2.02492	2.35408	0	0.438596	0	19.6659	25.3917	2.0585	0.15748	0	4.13437	5.71855	0	0.384246	0	13.2108	25.1015	0.440529	0.0381534
Pedobacter	0	0	0	0	0	0	0	0	0	0	0	0	0	0	0	0	0.657895	0	0	0.0319795	0	0	0	0	0	0	0	0	0	0	0	0
Pedomicrobium	0	0.544403	0.454408	0	0	0	0.126796	0.0806777	0	0	0	0.0559128	0.0328947	0	0	0	0	0	0.189825	0.159898	0	0	0	0.258398	0.198906	0	0.192123	0	0.0574383	0.16247	0	0
Pelagibius	0	0	0	0	0	0	0	0.0403388	0	0	0	0	0	0	0	0	0	0	0	0	0	0	0	0	0	0	0	0	0	0	0	0
Pelobacter	0	0	0	0	0	0	0	0.0403388	0	0	0	0	0.0657895	0	0	0	0	0	0.0759301	0	0	0	0	0	0	0	0	0	0	0	0	0
Pelomonas	0	0	0	0	0	0	0	0	0	0	0	0.0279564	0	0	0	0	0.438596	0	0	0	0.00857706	0.0524934	0	0	0	0	0	0	0	0	0	0
Pelosinus	0	0.0340252	0	0	0	0	0	0	0	0	0	0	0	0	0	0	0	0	0	0	0	0	0	0	0	0	0	0	0	0	0	0
Peptoniphilus	0	0	0	0	0	0	0	0	0	0	0	0	0.0328947	0	0	0	0	0	0	0	0	0	0	0	0	0	0	0	0.114877	0	0	0
Phaeospirillum	0	0	0	0	0	0	0	0	0	0	0	0	0.0657895	0	0	0	0	0	0	0	0	0	0	0	0	0	0	0	0	0	0	0
Phenylobacterium	0	0	0	0	0	0	0	0	0	0	0	0.0279564	0.0328947	0	0	0	0	0	0.0379651	0	0	0	0	0.0516796	0.0497265	0	0	0	0	0	0	0
Phormidiaceae	0	0	0	0	0	0	0.0845309	0	0	0	0	0.223651	0	0	0	0	0	0	0	0	0	0	0	0	0	0	0	0	0	0	0	0
Phormidium	0	0	0	0	0	0	0.0422654	0	0	0	0	4.52893	0	0	0	0	0.438596	0	0	0	0	0	0	0	0	0	0	0	0	0	0	0.152614
Phycicoccus	0	0	0	0	0	0	0	0	0	0	0	0	0	0	0	0	0	0	0	0.0959386	0	0	0	0	0	0	0	0	0	0	0	0
Phycisphaera	0	0	0	0	0	0	0.0422654	0	0	0	0	0	0	0	0	0	0	0	0	0	0	0	0	0	0	0	0	0	0	0	0	0
Phyllobacteriaceae genus	0	0	0	0	0	0	0	0.0403388	0	0	0	0	0.0657895	0	0	0	0	0	0	0	0	0	0	0	0	0	0	0	0	0	0	0
Phyllobacterium	0	0	0	0	0	0	0	0	0	0	0	0	0	0	0	0	0	0	0	0	0.00857706	0	0	0	0	0	0	0	0	0	0	0
Pirellula	0	1.46308	1.27234	0	0	0	1.05664	1.16983	0	0	0	0.0838692	0.592105	0.46729	0	0	0	0	0.303721	0.191877	0	0.15748	0	0.671835	0.497265	0	0	0	0.574383	0.324939	0	0
Planctomyces	0	0.0680504	0	0	0	0	0.0845309	0.201694	0	0	0	0.0559128	0.0657895	0	0	0	0	0	0	0.0319795	0	0	0	0	0.14918	0	0	0	0.114877	0	0	0
Planctomycetaceae genus	0	0.136101	0.181763	0	0	0	0.0845309	0.0403388	0	0	0	0.0279564	0.0657895	0	0	0	0	0	0	0.191877	0	0	0	0	0.198906	0	0	0	0	0	0	0
Planctomycetacia genus	0	0	0	0	0	0	0	0	0	0	0	0	0.0657895	0	0	0	0	0	0.0379651	0.0639591	0	0	0	0	0	0	0	0	0.0574383	0	0	0
Planctomycetales genus	0	0.136101	0.151469	0	0	0	0.338123	0.645422	0	0	0	0.0279564	0.197368	0	0	0	0	0	0.341686	0.159898	0	0	0	0.103359	0.14918	0	0	0	0.114877	0.0812348	0	0
Planifilum	0	0	0	0	0	0	0	0	0	0	0	0	0	0	0	0	0	0	0	0	0	0	0	0.0516796	0.099453	0	0	0	0	0	0	0
Planktothricoides	0	0	0	0	0	0	0	0	0	0	0	0.0838692	0	0	0	0	0	0	0	0	0	0	0	0	0	0	0	0	0	0	0	0
Planktothrix	0	0	0	0	0	0	0	0	0	0	0	0.0559128	0	0	0	0	0	0	0	0	0	0	0	0	0	0	0	0	0	0	0	0
Planomonospora	0	0	0	0	0	0	0.0422654	0	0	0	0	0	0	0	0	0	0	0	0	0	0	0	0	0	0	0	0	0	0	0	0	0
Planosporangium	0	0	0	0	0	0	0	0	0	0	0	0	0	0	0	0	0	0	0	0.127918	0	0	0	0	0.099453	0	0	0	0	0	0	0
Planotetraspora	0	0	0.121175	0	0	0	0	0	0	0	0	0	0.0328947	0	0	0	0	0	0	0.0319795	0	0	0	0	0	0	0	0	0	0	0	0
Plantactinospora	0	0	0	0	0	0	0	0	0	0	0	0	0.0328947	0	0	0	0	0	0	0	0	0	0	0.103359	0	0	0	0	0	0	0	0
Plectonema	0	0	0	0	0	0	0	0	0	0	0	0.223651	0	0	0	0	0	0	0	0	0	0	0	0	0	0	0	0	0	0	0	0
Pleomorphomonas	0	0	0	0	0	0	0	0	0	0	0	0.0279564	0	0	0	0	0	0	0	0	0	0	0	0	0	0	0	0	0	0	0	0
Pleurocapsa	0	0	0	0	0	0	0	0	0	0	0	0.0279564	0	0	0	0	0	0	0	0	0	0	0	0	0	0	0	0	0	0	0	0
Polaromonas	0	0	0	0	0	0	0	0	0	0	0	0	0	0	0	0	0	0	0	0	0	0	0	0	0	0	0	0	0	0	1.32159	0
Polyangium	0	0.374277	0.272645	0	0	0	0.422654	0.645422	0	0	0	0.0559128	0.394737	0	0	0	0	0	0.265756	0.383754	0	0	0	0.206718	0.0497265	0	0.0768492	0	0.229753	0.16247	0	0
Porphyrobacter	0	0	0	0	0	0	0.0845309	0	0	0	0	0.139782	0	0	0	0	0	0	0	0	0	0	0	0	0	0	0	0	0.114877	0	0	0
Prevotella	0	0	0	0	0	0	0	0	0	0	0	0	0	0	0	0	0	0	0	0	0	0	0	0	0	0	0	0	0	0.0812348	0	0
Prochlorothrix	0	0	0	0	0	0	0	0	0	0	0	0.0559128	0	0	0	0	0	0	0	0	0	0	0	0	0	0	0	0	0	0	0	0
Promicromonospora	0	0	0	0	0	0	0.0845309	0.0403388	0	0	0	0	0	0	0	0	0	0	0	0	0	0	0	0	0	0	0	0	0	0	0	0
Propionibacteriaceae genus	0	0	0	0	0	0	0	0	0	0	0	0	0	0	0	0	0	0	0	0	0	0	0	0	0.0497265	0	0	0	0	0	0	0
Propionibacterium	0	0	0	0.0244111	0	0	0	0	0	0	0	0	0.0986842	5.45171	0	1.73593	0	0	0	0	0	0	0	0.0516796	0	0	1.36407	0	0.0574383	0	0	0.22892
Propionigenium	0	0	0	0	0	0	0	0	0	0	0	0	0	0	0	0	0	0	0	0	0	0	0	0	0	0	0.941402	0	0	0	0	0
Prosthecobacter	0	0	0	0	0	0	0	0	0	0	0	0	0	0	0	0	0	0	0	0.0319795	0	0	0	0	0	0	0	0	0	0	0	0
Prosthecomicrobium	0	0.0340252	0.121175	0	0	0	0.0422654	0.282372	0	0	0	0.0559128	0.0986842	0	0	0	0	0	0.0379651	0	0	0	0	0.103359	0.248633	0	0	0	0	0	0	0
Proteiniphilum	0	0.0340252	0	0	0	0	0	0.0403388	0	0	2.70841	0.0279564	0	0	0	0	0	0	0	0	0	0	0	0	0	0	0	0	0	0	0	0
Proteus	0	0	0	0	0	0	0	0	0	0	0	0	0	0	0	0	0	0	0	0	0	0	0	0	0	0	0	0	0	0.0812348	0	0
Providencia	0	0	0	0	0	0	0	0	0	0	0	0	0	0	0.870687	0	0	0	0	0	0	0	0	0	0	0	0	0	0	0	0	0
Pseudanabaena	0	0	0	0	0	0	0	0	0	0	0	0.0279564	0	0	0	0	0	0	0	0	0	0	0	0	0	0	0	0	0	0	0	0
Pseudanabaenaceae	0	0	0	0	0	0	0	0	0	0	0	0.531171	0	0	0	0	0	0	0	0	0	0	0	0	0	0	0	0	0	0	0	0
Pseudomonas	17.1053	0	0.0302939	0.0366166	19.7452	3.03767	0.0845309	0.0806777	0	13.8554	0	0.0838692	0	6.69782	0.870687	0	7.01754	16.6667	0.0379651	0.0639591	1.18363	0.104987	2.78797	0	0	0.0482859	2.05572	26	0	0	0.881057	1.6406
Pseudonocardia	0	0.170126	0.969403	0	0	0	0.295858	0.968132	0	0	0	0.30752	1.31579	0	0.128991	0	0.219298	0	0	0.223857	0.428853	0.104987	0	3.10078	0.646445	3.09029	0	0	0.574383	0	0	0
Pseudonocardiaceae genus	0	0.272201	0	0	0	0	0	0.322711	0	0	0	0	0	0	0	0	0	0	0	0.0319795	0	0	0	0	0	0	0	0	0	0	0	0.0381534
Pseudosporangium	0	0	0	0	0	0	0.0422654	0	0	0	0	0.0559128	0.0657895	0	0	0	0	0	0	0.0959386	0	0	0	0.155039	0.0497265	0	0	0	0	0	0	0
Rahnella	0	0	0	0	0	0	0	0	0	0	0	0	0	0	0	0	0	0	0	0	0	0	0	0	0	1.014	0	0	0	0	0	0
Ramlibacter	0	0	0.0605877	0	0	0	0	0	0	0	0	0.279564	0.0328947	0	0	0	0	0	0.0379651	0	0	0	0	0.103359	0.14918	0	0	0	0	0.568643	0	0
Rathayibacter	0	0	0	0	0	0	0	0	0	0	0	0	0	0	0	0	0	0	0	0	0	0	0	0	0	0	0	0	0	0	0.440529	0
Rhizobiales genus	0	0	0.242351	0	0	0	0.211327	0.524405	0	1.20482	0	0.167738	0.296053	0	0	0	0	0	0	0	0	0	0	0.155039	0.348086	0	1.63305	0	0.0574383	0.324939	0	0
Rhizobium	0	0.0340252	0.514995	0	0.636943	0	0.549451	0.242033	0.0102659	7.83133	0	0.531171	0.625	0	0	0.105208	0.438596	0	0.531511	0.287816	0.00857706	0	0	0.465116	0.348086	0	0.0960615	0	0	0.16247	0	0.0381534
Rhodobacter	0	0	0	0	0	3.15917	0	0.0806777	0	0	0	0	0	0	0	0	0	0	0	0	0	0	0	0	0	0	0.710855	0	0	0	0	0
Rhodobium	0	0	0	0	0	0	0	0	0	0	0	0	0	0	0	0	0	0	0	0	0	0	0	0.206718	0	0	0	0	0	0	0	0
Rhodoblastus	0	0.0340252	0	0	0	0	0.0422654	0.0403388	0	0	0	0	0.0328947	0	0	0	0	0	0	0	0	0	0	0	0	0	0	0	0	0	0	0
Rhodocista	0	0.0340252	0	0	0	0	0.0422654	0	0	0	0	0	0.0328947	0	0	0	0	0	0	0	0	0	0	0	0.0497265	0	0	0	0	0	0	0
Rhodococcus	0	0.0340252	0.0302939	0	0	0	0.0422654	0	0	0	0	0	0	0	0	0	0.219298	0	0	0	0	0	0	0.0516796	0.198906	0	0	0	0	0	0	0
Rhodocytophaga	0	0	0	0	0	0	0	0	0	0	0	0.0279564	0	0	0	0	0	0	0	0	0	0	0	0	0	0	0	0	0	0	0	0
Rhodoferax	0	0	0	0	0	0	0	0.0403388	0	0	0	0	0	0	0	0	0	0	0	0	0	0	0	0	0	0	0	0	0	0	0	0
Rhodomicrobium	0	1.32698	1.06028	0.0122055	0	0	1.18343	1.69423	0	0	0	0.30752	2.17105	0	0	0	0	0	1.17692	0.735529	0.00857706	0	0	0.775194	0.248633	0	0	0	1.9529	1.29976	0.440529	0
Rhodoplanes	0	0.476353	0.454408	0	0	0	0.718512	0.887455	0	0	0	0.475259	1.74342	0.155763	0.193486	0	0	0	2.05011	5.37256	0.986362	0	0	0.775194	0.696171	0	0	0	1.37852	0.649878	0	0.0381534
Rhodopseudomonas	0	0.102076	0.0302939	0	0	0	0.169062	0.0806777	0	0	0	0.0279564	0.0657895	0	0.0322477	0	0	0	0.0379651	0.191877	0	0	0	0	0	0	0	0	0	0.0812348	0	0
Rhodospirillaceae genus	0	0.0340252	0.121175	0	0	0	0.169062	0.322711	0	0	0	0	0.0986842	0	0	0	0	0	0.0759301	0	0.0257312	0	0	0.0516796	0.099453	0	0	0	0.114877	0	0	0
Rhodovastum	0	0	0	0	0	0	0	0	0	0	0	0.0279564	0.0328947	0	0	0	0	0	0	0	0	0	0	0	0	0	0	0	0	0	0	0
Rhodovibrio	0	0.0340252	0.0605877	0	0	0	0	0	0	0	0	0	0	0	0	0	0	0	0	0	0	0	0	0	0	0	0	0	0	0	0	0
Rickettsia	0	0	0.0302939	0	0	0	0	0	0	0	0	0.0559128	0	0	0.161238	0	0	0	0	0.0639591	0	0	0	0	0	0	0	0	0	0	0	0
Rickettsiaceae genus	0	0	0	0	0	0	0	0	0	0	0	0	0	0	0	14.808	0	0	0	0	0	0	0	0	0	0	0	0	0	0	0	0
Rickettsiella	0	0	0	0	0	0	0	0.0403388	0	0	0	0	0	0	0	0	0	0	0	0	0	0	0	0	0	0	0	0	0	0.0812348	0	0
Roseateles	0	0	0	0	0	0.243013	0	0	0	0	0	0	0	0	0	0	0	0	0	0	0	0.0524934	0	0	0	0	0	0	0	0	0	0
Roseburia	0	0	0	0	0	0	0	0.0403388	0	0	0	0	0	0	0	0	0	0	0	0	0	0	0	0	0	0	0	0	0	0.487409	0	0
Roseiflexus	0	0.170126	0.151469	0	0	0	0.0422654	0.0806777	0	0	0	0.195695	0.164474	0	0	0	0	0	0.0759301	0.447713	0	0	0	0.258398	0	0	0	0	0.0574383	0.568643	0	0
Roseivirga	0	0.0340252	0	0	0	0	0	0	0	0	0	0	0	0	0	0	0	0	0	0	0	0	0	0	0	0	0	0	0	0	0	0
Roseobacter	0	0	0	0	0	0	0.0422654	0.0403388	0	0	0	0	0	0	0	0	0	0	0	0	0	0	0	0.0516796	0	0	0.461095	0	0	0	0	0
Roseomonas	0	0.238176	0.424114	0	0	8.93074	0.295858	0.0806777	0	0	0	0.363433	0.526316	0	0	0	0	0	0.0379651	0.191877	0	0	0	0.0516796	0.248633	0	0	0	0.172315	0.324939	0	0
Rubellimicrobium	0	0	0.242351	0	0	0	0.295858	0	0	0	0	0.670953	0.0986842	0	0	0	0.219298	0	0	0.0319795	0	0	0	0	0.14918	0	0	0	0	0.0812348	0	0
Rubrobacter	0	0	0.121175	0	0	0	0.549451	3.02541	0.0102659	0	0	0.223651	2.23684	0	0	0.0789058	0.438596	0	0	0	0	0	0	1.80879	1.83988	0	0	0	1.14877	0.243704	0	0.0381534
Rubrobacterales genus	0	0	0.181763	0	0	0	0.126796	0.161355	0	0	0	0	0.131579	0.155763	0	0	0.219298	0	0.0379651	0.0959386	0	0	0	0.0516796	0.497265	0	0	0	0.0574383	0.0812348	0	0
Ruminococcus	0	0.102076	0	0	0	0	0	0	0	0	0	0	0	0	0	0	0	0	0	0	0	0	0	0	0	0	0	0	0.172315	0.649878	0	0
Runella	0	0	0.0302939	0	0	0	0.0845309	0.121017	0	0	0	0.0559128	0.0657895	0	0	0	0	0	0	0	0.154387	0	0	0	0	0	0	0	0.172315	0	0	0
Saccharibacillus	0	0	0	0	0	0	0	0	0	0.60241	0	0	0	0	0	0	3.28947	0	0	0	0	0	0	0	0	0	0	0	0	0	0	0
Saccharococcus	0	0	0	0	0	0	0	0.0403388	0	0	0	0	0	0	0	0	0	0	0.0379651	0	0	0	0	0	0	0	0	0	0.114877	0.0812348	0	0
Saccharomonospora	0	0.0340252	0	0	0	0	0	0.0403388	0	0	0	0	0.0328947	0	0	0	0	0	0.0379651	0.0959386	0	0	0	0.0516796	0	0	0	0	0	0	0	0
Saccharopolyspora	0	0	0.121175	0	0	0	0.0422654	0.201694	0	0	0	0	0.164474	0	0	0	0.219298	0	0.0379651	0.127918	0	0	0	0.0516796	0.248633	0	0	0	0.114877	0.0812348	0	0
Saccharothrix	0	0.0340252	0	0	0	0	0.0422654	0.0403388	0	0	0	0.0838692	0.131579	0	0	0	0	0	0	0	0	0	0	0.155039	0	0	0	0	0	0	0	0
Salicola	0	0	0	0	0	0	0	0.0806777	0	0	0	0.111826	0.0328947	0	0	0	0	0	0	0	0	0	0	0.0516796	0.099453	0	0	0	0	0	0	0
Salinarimonas	0	0	0	0	0	0	0.295858	0.0403388	0	0	0	0.111826	0.230263	0	0	0	0	0	0	0	0	0	0	0.310078	0.14918	0	0	0	0.0574383	0.16247	0	0
Salinispora	0	0	0	0	0	0	0.0422654	0.0403388	0	0	0	0	0	0	0	0	0	0	0	0	0	0	0	0	0	0	0	0	0	0	0	0
Sanguibacter	0	0	0	0	0	0	0	0	0	0	0	0	0	0	0.225734	0	0	0	0	0	0	0	0	0	0	0	0	0	0	0	0	0
Saprospira	0	0	0	0	0.636943	0	0	0	0	0	0	0	0	0	0	0	0	0	0	0	0	0	0	0	0	0	0	0	0	0	0	0
Saprospiraceae genus	0	0	0	0	0	0	0	0.0403388	0	0	0	0	0	0	0	0	0	0	0	0	0.00857706	0	0	0	0	0	0.0192123	0	0	0	0	0
Schlegelella	0	0.0340252	0.0302939	0	0	0	0.338123	0.36305	0	0	0	0.0838692	0.263158	0	0	0	0	0	0	0.287816	0	0	0	0.0516796	0.14918	0	2.36311	0	0.459506	0.0812348	0	0
Scytonema	0	0	0	0	0	0	0.0845309	0	0	0	0	10.5116	0	0	0	0	0	0	0	0	0	0	0	0	0	0	0	0	0	0	0	0
Sediminibacterium	0	0	0	0	0	0	0	0	0	0	0	0	0	0.155763	0	0	0	0	0	0	0	0	0	0	0	0	0	0	0	0	0	0
Segetibacter	0	0	0	0	0	0	0	0.0806777	0.0205318	0	0	0	0.0986842	0	0	0	0	0	0	0	0	0	0	0.103359	0.546992	0	0	0	0	0.0812348	0	0
Segniliparus	0	0	0	0	0	0	0	0.0403388	0	0	0	0	0	0	0	0	0	0	0	0	0	0	0	0	0	0	0	0	0	0	0	0
Serratia	0	0	0	0	0	0	0	0	0	0	0	0	0	0	0	0	0	0	0	0	0	0	0	0	0.0497265	0	0	0	0	2.43704	0	0.152614
Shigella	0	0	0	0	0	0	0	0	0	0	0	0	0	0	0.0322477	0	0	0	0	0	0	0	0	0	0	0	0	0	0	0	0	0
Shimazuella	0	0.136101	0.39382	0	0	0	0.126796	0	0	0	0	0	0.0328947	0	0	0	0	0	0.0379651	0.0319795	0	0	0	0.103359	0.099453	0	0	0	0	0	0	0
Simkania	0	0	0	0	0	0.0607533	0	0	0	0	0	0	0	0	0	0	0	0	0	0	0	0	0	0	0	0	0	0	0	0	0	0
Singularimonas	0	0	0.0302939	0	0	0	0	0	0	0	0	0	0	0	0	0	0	0	0	0	0	0	0	0	0	0	0	0	0	0	0	0
Singulisphaera	0	0	0	0	0	0	0	0	0	0	0	0	0	0	0	0	0	0	0	0.0319795	0	0	0	0	0	0	0	0	0	0	0	0
Sinobacter	0	0	0	0	0	0	0.0422654	0	0	0	0	0	0	0	0	0	0	0	0	0	0	0	0	0	0	0	0	0	0	0	0	0
Sinomonas	0	0	0.0302939	0	0	0	0	0	0	0	0	0	0.0328947	0	0	0	0	0	0	0.0639591	0	0	0	0	0	0	0	0	0	0	0	0
Sinorhizobium	0	0.0340252	0.0908816	0	0	0	0.169062	0.0806777	0	0	0	0	0.0328947	0	0	0	0.877193	0	0.15186	0	0	0	0	0.103359	0	0	0	0	0.172315	0.16247	0	0
Skermanella	0	0	0	0	0	0	0.0422654	0.0806777	0	0	0	0.0838692	0.0986842	0	0	0	0	0	0	0	0	0	0	0.206718	0	0	0	0	0	0	0	0
Smaragdicoccus	0	0	0	0	0	0	0	0.161355	0	0.60241	0	0	0.131579	0	0	0	0	0	0	0	0.0343083	0	0	0	0	0	0	0	0.0574383	0	0	0
Smithella	0	0.272201	0.0302939	0	0	0	0.253593	0.282372	0	0	0	0	0.230263	0	0	0	0	0	0.835232	1.02335	0	0	0	0.0516796	0.14918	0	0	0	0.114877	0.16247	0	0
Sodalis	0	0	0	0	0	0	0	0	0	0	0	0	0	0	0	0	0	0	0	0	0	0	0	0	0	0.0482859	0	0	0	0	0	0.11446
Solimonas	0	0.136101	0	0	0	0	0	0	0	0	0	0	0	0	0	0	0	0	0	0	0	0	0	0	0	0	0	0	0	0	0	0
Solirubrobacter	0	7.38346	7.24023	0.0122055	0	0	4.86052	2.46067	0	2.40964	0	0.531171	3.58553	1.55763	0.483715	0	0.657895	0	3.75854	2.71826	0.0171541	0	0	2.22222	5.32074	0.434573	6.16715	0	4.93969	4.54915	0	0.11446
Solwaraspora	0	0	0	0	0	0	0	0	0	0	0	0	0.0986842	0	0	0	0.219298	0	0	0	0	0	0	0	0	0	0	0	0	0	0	0
Sorangium	0	0	0	0	0	0	0	0.0806777	0	0	0	0	0.131579	0	0	0	0	0	0.0379651	0.0319795	0	0	0	0	0	0	0	0	0	0	0	0
Spartobacteria genus	0	0	0	0	0	0	0.0422654	0.0403388	0	0	0	0	0	0	0	0	0	0	0	0	0	0	0	0	0	0	0	0	0	0	0	0
Sphaerisporangium	0	0	0	0	0	0	0.0422654	0.0403388	0	0	0	0	0.296053	0	0	0	0	0	0	0.0319795	0	0	0	0.0516796	0.0497265	0	0	0	0	0	0	0
Sphaerobacter	0	0	0	0	0	0	0.126796	0.121017	0	0	0	0	0.0986842	0	0	0	0	0	0	0.0319795	0	0	0	0.155039	0.14918	0	0	0	0.0574383	0.0812348	0	0
Sphaerospermopsis	0	0	0	0	0	0	0	0	0	0	0	0.0279564	0	0	0	0	0	0	0	0	0	0	0	0	0	0	0	0	0	0	0	0
Sphingobacteriaceae genus	0	0	0	0	0	0	0.0422654	0	0	0	0	0	0	0	0	0	0.219298	0	0	0	0	0	0	0	0	0	0	0	0	0.0812348	0	0
Sphingobacteriales genus	0	0	0.0302939	0	0	0	0	0	0.0102659	0	0	0	0	0	0	0	0	0	0	0	0	0	0	0	0	0	0	0	0	0	0	0
Sphingobacterium	0	0.0680504	0	0	0	0	0.0845309	0.161355	0	0	0	0.30752	0.131579	0	0	0.420831	0	0	0.0379651	0.0639591	0.0857706	0	0	0.0516796	0.0497265	0	0	0	0.0574383	0	0.881057	0
Sphingobium	0	0	0	0	0	0	0	0	0	0	0	0.0838692	0	0	0	0	0	0	0	0	0	0	1.43067	0	0	0	0	0	0	0	0	0
Sphingomonadaceae genus	0	0	0.0302939	0	0	0	0.126796	0.201694	0	0	0	0.167738	0.0986842	0	0	0	0	0	0	0	0	0	0	0.258398	0.397812	0	0	0	0	0	0	0
Sphingomonas	0	0.0680504	0.0302939	0	0	0	0.211327	0.564744	0	13.8554	0	1.42578	0.493421	5.14019	0	0.13151	7.23684	6.48148	0	0.0639591	0.0857706	0	0	0.103359	0.14918	7.33945	0.787704	0	0.287191	0	0.881057	0
Sphingopyxis	0	0	0	0	0	0	0	0.0806777	0.0102659	0	0	0	0	0	0	0	0	0	0	0	0	0	0	0	0	0	0	0	0	0	0	0
Sphingosinicella	0	0.0340252	0	0	0	0	0.0422654	0.161355	0.0102659	0	0	0	0	0	0	0	0	0	0	0.0319795	0	0	0	0.155039	0.0497265	0	0	0	0.0574383	0	0	0
Spirillospora	0	0.0340252	0	0	0	0	0	0	0	0	0	0	0	0	0	0	0	0	0	0	0	0	0	0	0	0	0	0	0	0	0	0
Spirochaeta	0	0	0	0	0	0	0	0	0	0	0	0	0.0328947	0	0	0	0	0	0	0	0	0	0	0	0	0	0	0	0	0	0	0
Spiroplasma	0	0	0	99.2921	0	0	0	0.0403388	98.8297	6.62651	0	0	0	0	0.0322477	0	0	0	0.0379651	0.255836	0	0	0	0.103359	0	0	0	0	0	0	4.84581	0
Spirulina	0	0	0	0	0	0	0	0	0	0	0	0.167738	0	0	0	0	0	0	0	0	0	0	0	0	0	0	0	0	0	0	0	0
Sporacetigenium	0	0	0	0	0	0	0	0	0	0	0	0	0.0328947	0	0	0	0	0	0	0	0	0	0	0	0	0	0	0	0	0	0	0
Sporanaerobacter	0	0	0	0	0	0	0.0845309	0	0	0	0	0	0	0	0	0	0	0	0	0	0	0	0	0	0	0	0	0	0	0	0	0
Sporichthya	0	0.0680504	0.121175	0	0	0	0.0422654	0.0403388	0	0	0	0	0.0986842	0	0	0	0	0	0.0379651	0.0959386	0	0	0	0.155039	0.099453	0	0	0	0.172315	0	0	0
Sporobacterium	0	0	0.0605877	0	0	0	0	0.0806777	0	0	0	0.0838692	0.0328947	0	0	0.0263019	0	0	0	0.0639591	0	0	0	0	0	0	0	0	0	0	0	0
Sporocytophaga	0	0	0	0	0	0	0.0845309	0	0	0	0	0.0838692	0	0	0	0	0	0	0	0.0319795	0	0	0	0	0.348086	0	0	0	0	0	0	0
Sporomusa	0	0.0680504	0	0	0	0	0	0	0	0	0	0	0	0	0	0	0	0	0.0379651	0	0	0	0	0	0	0	0	0	0	0	0	0
Sporosarcina	0	0	0	0	0	0	0.0422654	0	0	0	0	0	0	0	0	0	0	0	0	0	0	0	0	0	0	0	0	0	0	0	0	0
Stackebrandtia	0	0	0	0	0	0	0	0	0	0	0	0	0	0	0	0	0	0	0	0	0	0	0	0	0	0	0	0	0.0574383	0	0	0
Staphylococcus	0	0	0	0	0	0	0.0422654	0	0	0.60241	0	0	0.0986842	0	42.3734	0	0.438596	0	0	0.0319795	0	0	0	0	0.0497265	0	0	64.6364	0.34463	0.406174	0	0
Stappia	0	0	0	0	0	0	0	0	0	0	0	0.0279564	0	0	0	0	0	0	0	0	0	0	0	0	0	0	0	0	0	0	0	0
Stella	0	0.0340252	0.0302939	0	0	0	0.126796	0.242033	0.0102659	0.60241	0	0.167738	0.394737	0	0	0	0	0	0.22779	0.127918	0	0	0	0.361757	0.298359	0	0	0	0.172315	0.16247	0	0
Stenotrophomonas	0	0	0.0302939	0	0.636943	8.26245	0	0	0	0	3.44706	0	0	4.98442	0.257981	0	0.219298	0.925926	0	0.0319795	0.806244	0.209974	0.256787	0	0	0.676002	0	3.45455	0	0	0	0
Steroidobacter	0	0.136101	0.0908816	0	0	0	0.422654	0.766438	0	0	0	0.167738	0.296053	0	0	0	0.219298	0	0.22779	0.159898	0	0	0	0.310078	0.198906	0	0	0	0.287191	0.406174	0	0
Sterolibacterium	0	0.0340252	0.0908816	0	0	0	0.0845309	0.201694	0	0	0	0.0838692	0.164474	0	0	0	0	0	0.0759301	0.255836	0	0	0	0	0.0497265	0	0	0	0.0574383	0	0	0
Stigmatella	0	0.102076	0	0	0	0	0.0422654	0.121017	0	0	0	0	0.0986842	0	0	0	0	0	0.0379651	0	0	0	0	0	0.14918	0	0.24976	0	0	0.0812348	0	0
Stigonematales genus	0	0	0	0	0	0	0	0	0	0	0	0.195695	0	0	0	0	0	0	0	0	0	0	0	0	0	0	0	0	0	0	0	0
Streptacidiphilus	0	0	0	0	0	0	0	0	0	0	0	0	0.131579	0	0	0	0	0	0	0	0	0	0	0	0	0	0	0	0	0.16247	0	0
Streptococcus	0	0	0	0	5.09554	0	0	0	0	0	0	0	0	0.778816	0	0	0	0	0	0.0319795	0.317351	0.262467	0	0	0	0	0	0	0	0.16247	0	0
Streptomyces	0	0.782579	2.24174	0.0122055	0	0	2.40913	1.65389	0.0102659	1.80723	0	0.167738	2.89474	0	0	0	0	0	0.493546	0.67157	3.89399	0	0	2.5323	2.93386	2.36601	0.0192123	0	3.4463	1.38099	0	0
Streptomycetaceae genus	0	0	0	0	0	0	0	0	0	0	0	0	0.0657895	0	0	0	0	0	0	0	0	0	0	0	0	0	0	0	0	0	0	0
Streptosporangium	0	0	0.121175	0	0	0	0.0845309	0.0403388	0	0	0	0	0	0	0	0	0	0	0	0	0	0	0	0	0	0	0	0	0.0574383	0	0	0
Subaequorebacter	0	0	0	0	0	0	0	0	0	0	0	0	0	1.55763	0	0	0	0	0	0	0	0	0	0	0	0	0	0	0	0	0	0
Sulfitobacter	0	0	0	0	0.636943	0	0	0	0	0	0	0	0	0	0	0	0	0	0	0	0	0	0	0	0	0	0	0	0	0	0	0
Sulfurimonas	0	0	0	0	0	0	0	0	0	0	0	0	0	0	0	0	0	0	0	0	0	0	0	0	0	0	3.47743	0	0	0	0	0
Sutterella	0	0	0	0	0	0	0	0	0	0	0	0	0	0	0	0	0	0	0	0	0	0	0	0	0	0	0	0	0.114877	0	0	0
Symphyonema	0	0	0	0	0	0	0	0	0	0	0	0.0838692	0	0	0	0	0	0	0	0	0	0	0	0	0	0	0	0	0	0	0	0
Symphyonemopsis	0	0	0	0	0	0	0	0	0	0	0	0.0279564	0	0	0	0	0	0	0	0	0	0	0	0	0	0	0	0	0	0	0	0
Symploca	0	0	0	0	0	0	0	0	0	0	0	0.810735	0	0	0	0	0	0	0	0	0	0	0	0	0	0	0	0	0	0	0	0
Synechococcus	0	0	0	0	0	0	0	0	0	0	0	0.922561	0	0	0	0	0	0	0	0	0	0	0	0	0	0	0	0	0	0	0	0
Synechocystis	0	0	0	0	0	0	0	0	0	0	0	0.0279564	0	0	0	0	0	0	0	0	0	0	0	0	0	0	0	0	0	0	0	0
Synergistes	0	0	0	0	0	0	0	0	0	0	0	0	0	0	0	0	0	0	0	0	0	0.0524934	0	0	0	0	0	0	0	0	0	0
Syntrophorhabdus	0	0	0	0	0	0	0	0	0	0	0	0	0	0.155763	0	0	0	0	0	0	0	0	0	0	0	0	0	0	0	0	0	0
Tatlockia	0	0	0	0	0	0	0	0	0	0	0	0.0279564	0	0	0	0	0	0	0	0	0	0	0	0	0	0	0	0	0	0	0	0
Terrabacter	0	0	0	0	0	0	0	0	0	0	0	0	0	2.18069	0	0	0	0	0	0	0	0	0	0	0	0	0	0	0	0	0	0
Terracoccus	0	0	0	0	0	0	0	0	0	0	0	0	0	0	0	0	0.219298	0	0	0	0.0600395	0	0	0	0	0	0	0	0	0	0	0
Terrimonas	0	0	0	0	0	0	0.126796	0.0806777	0	0	0	0.0838692	0	0	0	0	0	0	0	0.127918	0	0	0	0	0.0497265	0	0	0	0.0574383	0	0	0
Tetrasphaera	0	0	0	0	0	0	0	0	0	0	0	0	0	0	0	0.0263019	0	0	0	0	0	0	0	0	0	0	0	0	0	0	0	0
Thalassobacter	0	0	0	0	0	0	0	0	0	0	0	0	0	0	0	0	0	0	0	0	0	0	0	0	0	0	5.34102	0	0	0	0	0
Thermaerobacter	0	0	0	0	0	0	0	0	0	0	0	0	0	0	0	0	0	0	0	0	0	0	0	0.0516796	0	0	0	0	0	0	0	0
Thermanaeromonas	0	0	0	0	0	0	0	0.0403388	0	0	0	0	0	0	0	0	0	0	0	0	0	0	0	0	0	0	0	0	0.114877	0.16247	0	0
Thermoactinomyces	0	0	0	0	0	0	0	0	0	0	0	0	0	0	0	0	0	0	0	0	0	0	0	2.5323	2.58578	0	0	0	0.172315	0	0	0
Thermoactinomycetaceae genus	0	0	0	0	0	0	0	0	0	0	0	0	0	0	0	0	0	0	0	0	0	0	0	0.878553	1.29289	0	0	0	0	0	0	0
Thermoanaerobacterales genus	0	0	0	0	0	0	0	0	0	0	0	0	0	0	0	0	0	0	0	0	0	0	0	0.103359	0	0	0	0	0	0	0	0
Thermobifida	0	0	0	0	0	0	0.0845309	0	0	0	0	0	0.0328947	0	0	0	0	0	0	0	0	0	0	0.0516796	0	0	0	0	0	0	0	0
Thermobispora	0	0	0	0	0	0	0	0	0	0	0	0	0.0328947	0	0	0	0	0	0	0	0	0	0	0	0	0	0	0	0	0	0	0
Thermodesulfobium	0	0	0	0	0	0	0.126796	0	0	0	0	0	0.0657895	0	0	0	0	0	0.0759301	0	0	0	0	0.0516796	0	0	0	0	0	0	0	0
Thermodesulforhabdus	0	0	0.0302939	0	0	0	0	0	0	0	0	0.0279564	0	0	0	0	0	0	0.0759301	0.0639591	0	0	0	0	0	0	0	0	0	0	0	0
Thermodesulfovibrio	0	0	0	0	0	0	0	0	0	0	0	0	0	0	0	0	0	0	0	0	0	0	0	0	0	0	0	0	0.0574383	0	0	0
Thermoflavimicrobium	0	0	0	0	0	0	0	0	0	0	0	0	0	0	0	0	0	0	0	0	0	0	0	0.155039	0	0	0	0	0	0	0	0
Thermoleophilum	0	0	0.0302939	0	0	0	0	0.0403388	0	0	0	0	0	0	0	0	0	0	0	0	0	0	0	0	0.099453	0	0	0	0.0574383	0	0	0
Thermomicrobium	0	0	0	0	0	0	0.0422654	0.0403388	0	0	0	0.0838692	0.0657895	0	0	0	0	0	0.0379651	0.0319795	0	0	0	0	0.099453	0	0	0	0	0.0812348	0	0
Thermomonas	0	0	0	0	0	0	0	0	0	0	0	0.0559128	0.0328947	0	0	0	0	0	0	0.67157	0	0	0	0	0	0	0	0	0	0	0	0
Thermomonospora	0	0	0.0605877	0	0	0	0	0	0	0	0	0	0	0	0	0	0	0	0	0	0	0	0	0	0	0	0	0	0.172315	0	0	0
Thermomonosporaceae genus	0	0	0.0302939	0	0	0	0	0	0	0	0	0	0.131579	0	0	0	0	0	0	0	0	0	0	0	0	0	0.0576369	0	0	0	0	0
Thermosporothrix	0	0.0680504	0.121175	0	0	0	0.0845309	0.0806777	0	0	0	0	0	0	0	0	0	0	0	0.735529	0.128656	0	0	0	0.0497265	0	0	0	0.114877	1.13729	0	0
Thermosynechococcus	0	0	0	0	0	0	0	0	0	0	0	0.0559128	0	0	0	0	0	0	0	0	0	0	0	0	0	0	0	0	0	0	0	0
Thermus	0	0	0.0302939	0	0	0	0	0	0	0	0	0	0	0	0	0	0	0	0.0759301	0.0319795	0	0	0	0	0	0	0	0	0.0574383	0	0	0
Thiobaca	0	0	0	0	0	0	0	0	0	0	0	0	0	0	0	0	0	0	0	0	0	0	0	0	0	0	0	0	0.0574383	0	0	0
Thiobacillus	0	0	0	0	0	5.65006	0	0	0	0	0	0	0	0	0	0	0	0	0	0	0	0	0	0	0	0	0	0	0	0	0	0
Thiobacillus Gammaproteobacteria	0	0	0	0	0	0	0	0	0	0	0	0	0	0	0	0	0	0	0	0	0	0	0	0	0.0497265	0	0	0	0	0	0	0
Thiorhodospira	0	0.374277	0.121175	0	0	0	0.126796	0.0806777	0	0	0	0.0559128	0	0	0	0	0	0	0	0	0	0	0	0.0516796	0	0	0	0	0	0	0	0
Tindallia	0	0	0	0	0	0	0	0	0	0	0	0	0	0	0	0	0	0	0	0	0	0.0524934	0	0	0	0	0	0	0	0	0	0
Tistrella	0	0.136101	0.0605877	0	0	0	0.253593	0.0806777	0	0	0	0	0.0328947	0	0	0	0	0	0.0759301	0.0639591	0	0	0	0	0	0	0	0	0	0.0812348	0	0
Tolypothrix	0	0	0	0	0	0	0	0	0	0	0	0.0838692	0	0	0	0	0	0	0	0	0	0	0	0	0	0	0	0	0	0	0	0
Treponema	0	0	0	0	0	0	0	0	0	0	0	0	0	0	0	0	0	0	0	0	0	0.0524934	0	0	0	0	0	0	0	0	0	0.0763068
Trichocoleus	0	0	0	0	0	0	0	0	0	0	0	0.111826	0	0	0	0	0	0	0	0	0	0	0	0	0	0	0	0	0	0	0	0
Trichormus	0	0	0	0	0	0	0	0	0	0	0	0.0279564	0	0	0	0	0	0	0	0	0	0	0	0	0	0	0	0	0	0	0	0
Truepera	0	0.170126	0.242351	0	0	0	0.0845309	0	0	0	0	0.0279564	0	0	0	0	0	0	0.0759301	0.0639591	0	0	0	0	0	0	0	0	0.0574383	0	0	0
Tsukamurella	0	0	0	0	0	0	0	0	0	0	0	0	0	0	0	0	0.657895	0	0	0	0	0	0	0	0.14918	0	0	0	0	0	0	0
Turicibacter	29.8246	0	0	0	0	0	0	0.0403388	0	0	0	0	0	0	0	0	0	0	0	0	0.265889	0	0	0	0	0	0	0	0	0	0	0.190767
Ulvibacter	0	0	0	0	0	0	0	0	0	0	0	0	0	0	0	0	0	0	0	0	0	0	0	0	0	0	0	0	0	0	0	0.152614
Vagococcus	0	0	0	0	0	0	0	0	0	0	0	0	0	0	2.99903	0	0	0	0	0	0	0	0	0	0	0	0	0	0	0	0	0
Vampirovibrio	0	0	0	0	0	0	0	0	0	0	0	0	0.0657895	0	0	0	0	0	0	0	0	0	0	0	0.0497265	0	0	0	0	0	0	0
Variovorax	0	0	0.0605877	0	0	0.607533	0.126796	0.0403388	0	1.20482	0	0.195695	0.0328947	0	0	0	0	0.925926	0.0379651	0	0	0	0	0.0516796	0	0	0	0	0	0.0812348	1.76211	0
Veillonella	0	0	0	0	0	0	0	0	0	0	0	0	0	0	0	0	0	0	0	0	0.20585	0	0	0	0	0	0	0	0.0574383	0	0	0
Verrucomicrobiaceae genus	0	0	0	0	0	0	0	0	0	0	0	0.0559128	0	0	0	0	0	0	0	0	0	0	0	0	0	0	0	0	0	0	0	0
Verrucomicrobiae	0	0	0	0	0	0	0.0422654	0.201694	0	0	0	0.0559128	0.0328947	0	0	0	0	0	0	0	0	0	0	0	0	0	0	0	0.287191	0	0	0
Verrucomicrobiales genus	0	0.170126	0.212057	0	0	0	0.169062	0.0806777	0	0	0	0.0559128	0.164474	0	0	0	0	0	0.265756	0.223857	0.0857706	0	0	0.0516796	0.0497265	0	0	0	0.172315	0	0	0
Verrucomicrobium	0	0.238176	0.272645	0	0	0	0.549451	0.564744	0	0	0	0.726866	0.460526	0	0	0	0	0	2.12604	0.799488	0	0	0	0.206718	0.447539	0	0	0	0.97645	0.406174	0	0
Verrucosispora	0	0	0	0	0	0	0	0.0403388	0	0	0	0.0279564	0	0	0	0	0	0	0	0	0	0	0	0	0.14918	0	0.0192123	0	0	0	0	0
Vibrio	0	0	0	0	0	0	0	0	0	0	0	0	0.0328947	0	0	0	0	0	0	0	0	0	0	0	0	0	0	0	0	0	0	0
Victivallis	0	0.0680504	0.0302939	0	0	0	0.0422654	0	0	0	0	0	0.0328947	0	0	0	0	0	0.113895	0	0	0	0	0	0.14918	0	0	0	0.114877	0.16247	0	0
Virgibacillus	0	0	0	0	0	0	0	0	0	0	0	0	0	0	0	0	0	0	0	0	0	0	0	0.103359	0.099453	0	0	0	0	0	0	0
Virgisporangium	0	0	0	0	0	0	0.211327	0.0806777	0	0	0	0.419346	0.0986842	0	0	0	0	0	0	0.0319795	0	0	0	0.103359	0.198906	0	0	0	0	0	0	0
Weissella	0	0	0	0	0	0	0	0	0	0	0	0	0	0	0	0	0	0	0	0	0	0	0	0	0	0	0	0	0	0	0	0.190767
Westiellopsis	0	0	0	0	0	0	0	0	0	0	0	0.0838692	0	0	0	0	0	0	0	0	0	0	0	0	0	0	0	0	0	0	0	0
Williamsia	0	0	0	0	0	0	0	0.121017	0	0	0	0	0	0	0	0	0	0	0.0379651	0	0	0	0	0	0	0	0	0	0	0	0	0.0381534
Wolbachia	0	0	0	0	0	0	0	0	0	0	0	0	0	0	0	3.31405	0	0	0	0	0	0	0	0	0	0	0	0	0	0	0	0
Wolinella	0	0.102076	0.181763	0	0	0	0.0845309	0.201694	0	0	0	0.0279564	0.131579	0	0	0	0	0	0.113895	0.0319795	0	0	0	0.103359	0.248633	0	0	0	0	0	0	0
Xanthomonadaceae genus	0	0	0	0	0	0	0	0	0.0718612	0	0	0	0	0	0	0	0	0	0	0	0	0	0	0.0516796	0	0	0	0	0	0	5.72687	0
Xanthomonas	0	0	0	0	0	0	0.0422654	0.0403388	0	1.80723	0.0351741	0	0	0	0	0	0.438596	0	0	0.0319795	0.0428853	0	0	0	0	0	0	0	0	0.16247	0	0
Xenorhabdus	0	0	0	0	0	0	0	0	0	0	0	0	0	0	0	0	0	0	0	0	0	0	0	0	0	0	0	0	0	0	0	0.0381534
Yersinia	0	0	0	0	0	0	0	0	0	0	0	0	0	0	0	0	0	0	0	0	0	0	0	0	0	0.193143	0	0	0	0	0	0.457841
Zoogloea	0	0.102076	0	0	1.27389	0	0	0.0403388	0	0	0	0	0.0328947	0	0	0	0.219298	0	0	0	0	0	0	0	0	0.0965717	0	0	0.0574383	0	0	0
